**I. A novel multiplatform model of human red blood cell homeostasis applied to investigate the mechanisms behind the multiple effects of elevated  $[Ca^{2+}]_i$**

**Simon Rogers\* and Virgilio L. Lew\*\***

\*School of Computing Science, University of Glasgow, UK, and \*\*Physiological Laboratory, Department of Physiology, Development and Neuroscience, University of Cambridge, Downing Site, Cambridge CB2 3EG, UK

**Emails:**

Simon Rogers: [simon.rogers@glasgow.ac.uk](mailto:simon.rogers@glasgow.ac.uk)

Virgilio L. Lew: [vll1@cam.ac.uk](mailto:vll1@cam.ac.uk)

**Short Title:** Modelling human red blood cell homeostasis in health and disease

**Key words:** Red blood cells, PIEZO1, Gardos channels, AE1,  $Ca^{2+}$  transport, volume regulation, cell pH control

## Abstract

Wild-type and mutant forms of PIEZO1 and Gardos channels (KCNN4) play important roles in physiological red blood cell (RBC) senescence, and within a group of inherited haemolytic anaemias characterized by RBC dehydration resulting from elevated  $[Ca^{2+}]_i$ . The first purpose of this paper is to introduce a new multiplatform JAVA-based mathematical-computational model of RBC homeostasis for investigating the dynamics of changes in RBC homeostasis in health and disease. The second purpose is to apply the model to investigate in depth the multiple effects associated with  $Ca^{2+}$ -induced potassium permeabilization. This investigation is a necessary preliminary for the application of the model to elucidate the mechanisms behind the changes in RBC homeostasis during capillary transits and over the full circulatory lifespan of the cells in normal and sickle cells, the subject of the next two papers of this series. Using the red cell model (RCM), framed within a detailed tutorial context, we design and run *in silico* representations of experimental protocols to study global RBC responses to  $K^+$  permeabilization covering a wide range of experimental, physiological and pathological conditions. Model outputs report the evolution in time of all the homeostatic variables in the system allowing, for the first time, a detailed and comprehensive account of the complex processes shaping global cell responses. Analysis of the results explained the mechanisms by which the entangled operation of multiple RBC components link  $Ca^{2+}$ -induced cell dehydration and protein crowding to cell acidification and to the generation of hypertonic, alkaline effluents. Open access to the JAVA model in a GitHub repository, together with the tutorial primed for the current investigation pave the way for researchers and clinicians to apply the model on many different aspects of RBC physiology and pathology.

## Introduction

All living cell processes result from multiple inextricably entangled molecular mechanisms influencing each other. Models of cellular homeostasis encode this entanglement through the physical constraints imposed by charge and mass conservation. The different molecular components of the cell respond independently to system perturbations within the constrained boundaries by altering common substrate concentrations thus influencing each other and generating complex interconnected responses. The unexpected and counterintuitive nature of verified model predictions documented in the past reflects the weakness of intuition to handle these levels of complexity, leaving experimental verification of model predictions as the critical test of the correctness of the model representation of the entangled cell responses and of the suggested mechanisms (1-11).

Building on the same modelling approach which helped solve issues of substantial relevance in biology and medicine in the past (12-19) we introduce here a vastly extended and fully updated JAVA model of the homeostasis of human RBCs using the Gardos effect, of historic and renewed relevance, to demonstrate how to use the model to unravel the molecular interactions that participate in processes controlling or affecting RBC hydration in physiological and pathological conditions and to explain the mechanisms behind, an issue of intense current haematological interest (20-28) .

The JAVA model introduced here includes a graphical user interface along with a link to the GitHub repository where the code is held and continually updated. In the Appendix we provide a computational flowchart, full details of the model parameters and variables, and of extensions based on literature updates incorporating, among others, cytoplasmic  $\text{Ca}^{2+}$  and  $\text{Mg}^{2+}$  buffering, ionophore-mediated transport, the effects of oxy-deoxy transitions on the isoelectric point of haemoglobin and cell pH, and a functional expression of deformation-activated PIEZO1 channels in the RBC membrane, of particular relevance for the study of RBC homeostasis during capillary transits and circulatory lifespan, the subject of the next two papers of this series (29, 30).

Comprehensive analysis of the full spectrum of changes in RBC homeostatic variables enables here, for the first time, a detailed understanding of the sets of interconnected non-linear processes that modify the intracellular milieu, membrane potential and membrane traffic during  $\text{K}^+$  permeabilization. For readers unfamiliar with the subject, a recent brief review and the references therein may be of help (31).

## Methods. The red cell model (RCM)

The model was designed to be used as a research, clinical and didactic tool for biologists, biophysicists, clinical researchers, haematologists and general scientists seeking to understand the mechanisms behind the complex cell responses controlling cell homeostasis. The flowchart of figure 1 illustrates the approach applied for the design of the user interface aiming to optimize comparisons between predicted and experimental results, a design guided by the principle that modelling usefulness depends on a close proximity between model and bench. Use of the model will be illustrated in this paper by applying it to an analysis of the “Gardos effect”, trying to harmonize scientific interest with tutorial simplicity.

**Open access to the red cell model.** In this and the next paper of this series (29) we apply the core red cell model named RCM\*.jar, available for downloading from the GitHub repository <https://github.com/sdrogers/redcellmodeljava>. The model operates as a \*.jar programme within the JAVA environment which needs to be preinstalled. It is recommended not to alter the original file name as it contains coded information on date and update status. Altered names are best applied to shortcuts. Double-click to activate the programme. As explained in the tutorial Boxes below, operation of the RCM model generates protocol files as editable \*.txt files, and \*.csv files containing the results of simulations. By default, these are saved within the same directory as the one from which the programme is operated, a choice easily modified from within the programme.

**Using the “Gardos effect” to introduce the red cell model (RCM).** Besides its didactic and historic value, the example chosen is of substantial current interest for RBC physiology and pathology. It is based on a puzzling original finding by Gardos (32-34), the “Gardos effect”, a rapidly developing dehydration of red blood cells incubated in plasma-like media following the joint addition of a metabolic inhibitor and a metabolic substrate. Years later, the mystery surrounding the sequential steps involved in the Gardos effect was elucidated by showing that the inhibitor-substrate combinations (iodoacetamide with glucose or inosine, for instance) caused accelerated and profound ATP depletion, the substrate consuming ATP during the initial steps of glycolytic metabolism while downstream ATP production remained blocked by the inhibitor (35-37). ATP depletion, in turn, reduced  $\text{Ca}^{2+}$  extrusion through the plasma membrane calcium pump (PMCA) with gradual increases in the concentration of  $\text{Ca}^{2+}$  in the cytoplasm,  $[\text{Ca}^{2+}]_i$  (38, 39). Elevated  $[\text{Ca}^{2+}]_i$  activated a  $\text{Ca}^{2+}$ -sensitive  $\text{K}^+$ -selective permeability pathway leading to rapid KCl loss and cell dehydration. Gardos’ landmark discovery of this permeability pathway was eventually recognized as the first report of a calcium-sensitive  $\text{K}^+$  channel, (KC3.1, KCNN4 gene), baptized as the Gardos channel in the RBC lore (37).

When the Gardos effect was originally simulated (2) the model predicted not only the expected and documented effects of KCl loss and cell dehydration but also some totally unexpected and counterintuitive outcomes, soon experimentally verified (3). Eventually some of these “side-effects” proved crucial for unravelling the fast track dehydration mechanism of a subpopulation of sickle cells, the irreversible sickle cells (40, 41), whose transient hyperdense state causes widespread vasoocclusion and is responsible for most of the clinical symptoms in sickle cell disease (12). The Gardos channels were considered important participant in the process of progressive RBC densification during circulatory senescence, and channel mutations have recently also been implicated in congenital haemolytic anaemias with altered RBC hydration states (26, 42, 43). It is the wide scope of the seemingly unrelated homeostatic RBC changes triggered by Gardos channel activation which makes the exploration of the Gardos effect such an excellent didactic choice for introducing the user to the operation of the RCM and for illustrating how the model can be used for an in-depth scientific exploration of the entangled mechanisms behind global cell responses.

Following the sequence outlined in Fig 1, we start by formulating a question and by designing an experimental protocol expected to provide the answer. We simulate that protocol with the model, run the model, report outputs, analyse the results and try to interpret the mechanisms behind predicted responses. Following past experience, the analytical stage often exposes flaws or improvements required in the original protocol leading to further simulations to unravel the complexities of a certain process, in turn guiding the improvements

needed in the design of the original experimental protocol, a path illustrated here in the tutorial.

The technical aspects concerned with model operation will be displayed in four separate consecutively numbered text boxes containing detailed instructions on how to construct protocols and run the simulations. Box-separated material will allow readers primarily interested in the science to follow the main text unhindered by details and tutorials related to model use.

***The protocol-prompting question:*** With RBCs suspended in plasma-like media at 37°C, what are the effects of sudden and simultaneous inhibition of the Na/K and calcium pumps? With this formulation we bypass the inhibitor-substrate stage of the original Gardos effect and focus on the downstream effects of pump inhibition. There is also a simple experimental correlate for such a simulation. Vanadate, a well known irreversible inhibitor of P-type ATPases, the family the Na/K and PMCA pumps belong to, instantly blocks pump-mediated transport when added to a RBC suspension, without affecting RBC metabolism (44, 45). We outline first the vanadate version of the experimental protocol and follow up with the simulated correlate in the model.

***Outline of experimental protocol:*** We start with fresh, washed RBCs suspended in a plasma-like saline at a 10% cell volume fraction (0.1 CVF or 10% haematocrit, Hct). The suspension is kept at 37 °C under constant magnetic stirring to prevent cell sedimentation and the formation of significant diffusional gradients. After about 30 min to allow for minor adjustments to the new conditions, we add vanadate to instantly block ion transport through the Na/K and calcium pumps, and follow the evolution in time of system variables, the vanadate version of the Gardos Effect protocol.

***Outline of simulated protocol:*** In the simulations we bypass the usual preparatory steps from drawing blood to washing the RBCs free of plasma, white cells and platelets. We start with a 0.1 cell volume fraction (CVF, equivalent to a 10% Hct) in a plasma-like, isosmotic HEPES-Na-buffered saline solution, and probe system stability while incubated at 37°C over a control period. Vanadate addition is represented by sudden 100% inhibition of Na/K and PMCA pumps, and the model follows the evolution in time of all the variables in the system. Because the cell-medium system is treated as a closed, two-compartment system, mass conservation applies, and redistribution equations compute the composition changes in each compartment at each instant of time. Instant, gradient-free uniformity in the composition of cell and medium compartments is assumed throughout representing the approximation intended by magnetic stirring in the experimental protocol. Simulated protocols are stored in text files, and model outputs reporting the changes in all the homeostasis variables of the system as a function of time are saved as comma separated (csv) spreadsheets.

The instructions for entering protocol simulations are contained in two separate sections in the model: the Reference State (RS) and the Dynamic State (DS). The RS defines the initial constitutive condition of the RBC under investigation. In the DS section the user enters the protocol prescribed sequence of perturbations to parameters and variables in consecutive DS pages, automatically numbered by the programme. All user entries in RS and DS modify default-suggested values. Text windows within each of the RS and DS pages provide contextual guiding information. Separate RS and DS Help pages provide additional information for users to consult.

In Boxes 1-4 next, the reader is guided step by step on how to simulate the vanadate version of the Gardos effect protocol using the RCM\*.jar executable. Although the tutorial remains focused on the chosen example, it is hoped the user will note, along the way, the vast range of experimental simulations the software enables within a rather austere display of choices. The model output, stored in csv format, contains the evolution in time of all the homeostatic variables considered in the model during the successive protocol-defined stages for subsequent plotting and analysis. In the Results and Discussion sections we illustrate how this data can be used to report the results and to explore the mechanisms behind each of the predicted responses.

**Box 1: The Reference State.** Figure 2 shows the first dialog box that comes up when we activate RCM.jar. It contains a Welcome message and two optional prompts at the bottom. Select New Experiment, as there are no yet stored protocols on file. This brings up the central page for simulating experiments (Fig 3). This page contains two main panels and five tags at the bottom. The left panel, the Reference State (RS), defines the initial constitutive condition of the RBCs at the start of experiments. On the right panel, the Dynamic State (DS), the user specifies the duration of the experiment, the frequency and precision of the data points with which results will be reported, and the changes in the value of selected parameters and variables meant to represent the successive perturbations the RBCs are exposed to in the course of experiments. Press the HELP tag at the bottom for a brief guide to all entries in the RS and DS panels, and to those in the dedicated DS PIEZO tag. The default values assigned to each of the parameters and variables in the Reference State and in the Dynamic State, listed within each of the tags, represent rounded *mean values* obtained from the literature for RBC samples from healthy adults (see Appendix for glossaries). It is important to note that when using the RS default values, model predictions will be reporting the responses of this particular *mean* representative cell. With a mean circulatory lifespan of about 120 days, real RBC samples are a mix of about 120-day cohorts. Because many constitutive variables change with RBC age it is important to bear in mind modifying the RS default values when exploring responses associated with RBC age diversity. For the Gardos effect simulation we will accept the default Reference State values of the “mean” RBC and proceed to simulate the successive experimental steps within the Dynamic State right panel (Fig 2).

**Box 2: The Dynamic States.** The outlined protocol requires implementation in two DS stages, DS1 and DS2, the first to allow the system to settle into whichever new conditions are set and provide baseline values of variables before the next experimental stage, the second to simulate the Vanadate-version of the Gardos effect with sudden inhibition of the Na/K and calcium pumps. Start the DS1 stage by selecting the “Time & Data output frequency” tab on the right. This opens up a full dialog box on the left. You select “time” and then “Modify value”, or simply double click on “time” to open the “Input” window where you enter the new or modified value; let us use 30 min in this instance. Note how the “time 30” instruction becomes registered on the left-side window of the DS1 panel. Errors are easily corrected by repeating these steps with amended entries. Now select the “Cell fraction & medium composition” tab. Operating the prompts in the way instructed above for “time” proceed to enter 0.1 for the cell volume fraction (CVF) to represent a 10% haematocrit. Leave all other variables unchanged, as the default medium composition approximates widely used conditions for “plasma-like”, protein-free media used in experiments with RBCs. Note how the changes become incorporated in the protocol window of DS1.

Next click on “Add DS stage” to add a DS2 stage. Set time to 60 min and enter 100 in the Transport Inhibition tab for 100% inhibition of both the PMCA and the Na/K pump. The cell fraction remains as set for DS1. *Instructions are automatically carried over sequential DS stages unless specifically deleted or changed.*

**Box 3. Running the model, inspecting preliminary results, and considering the desirability of protocol improvements.** We are now ready to run the simulation. Good practise recommends saving the protocol at this stage, for immediate availability if changes become necessary. Press the “Write a protocol file” tag at the bottom of the central page (Fig 3). Choose a directory and filename (GE1 for instance). The protocol is saved as a text-file with name GE1.txt, editable in



any text editor. Figure 4A shows what the text-file looks like at this stage. Although it is possible for the user to modify entries in the text file, we envisage the file mainly being used for archiving and allowing protocols to be saved and reloaded later. To minimise the chance of user error, we recommend all protocol changes to be made from within the central page of the user interface.

Select “Run Model” at the bottom of the central page. This opens a window on the left overlapping the central page and showing the progress of the model computations, almost instant for this protocol. At the bottom, three commands offer data saving, window closing and data plotting options. The data plotting option is particularly useful for a preliminary exploration of results before saving data, to enable protocol adjustments on the go before reaching worth-saving outputs. Let us illustrate this by reviewing the data outputs from the current protocol.

Press the Launch plotter command. This opens a small window with a comprehensive list of all the model variables. Our interest is directed primarily at the variables most influenced by PMCA inhibition and Gardos channel activation: cell volume, membrane potential, potassium flux and cell calcium. Press the relative volume variable, V/V. This brings up a basic graph of V/V as a function time for the set duration of the experiment. Scaling of the y-axis automatically adapts to the magnitude of change in the selected variable. Within the first hour after pump inhibition, we note a few points outlining a tiny increase in cell volume followed by an accelerating decrease. But with such poor quality of data it is impossible to derive any significant information. It is clear from this graph that we need a much higher frequency of data output points and a much more extended time-scale to explore properly the predicted effects.

**Box 4. Correcting the protocol using graphic output feedback and saving improved final model output.** Let us return to the original protocol to increase data output frequency and experiment duration. Close any open plot windows, and the window showing model progress. In DS1 press the “Time & Data output frequency” tab and change the “cyclesperprint” from its default value of 777 to a lower value, 11 in our example (thus forcing the model to output values at a much higher frequency). In DS2 change “time 60” to “time 600” to explore effects over a longer period. Save the modified protocol overwriting the original one using the same name (Fig 4B). Now run the model again. Note that this time the model run takes longer in line with the increased density of output data and duration of the experiment. Launch the Plotter and explore the time changes of the variables listed as of primary interest: V/V, QCa, CCa2+, Em, and FK Gardos. Note the smooth appearance of the curves with the new setting of “cyclesperprint” at 11.

The increased data-sampling frequency and duration of the experiment seem to adequately cover now the period of major changes and deliver smooth data outputs, rendering outputs well-suited for an in-depth analysis of the full RBC response to the vanadate-simulated Gardos effect. To save the full complement of data generated by the model press the Save Output tab and at the filename prompt enter GE1. This generates a file named GE1.csv open to scrutiny and graphing in different software platforms. We will now generate figures from this file. These should guide the user on how to report the results, and on how to analyse and interpret the data in search of the mechanisms behind the observed effects.

## Results and Analysis

***Predicted time-course of changes in RBC volume, membrane potentials, calcium contents and Gardos channel mediated  $K^+$  flux following the vanadate-protocol simulation of the Gardos effect.*** Following pump-inhibition, the change in RCV (Fig 5A) shows three distinct phases, a slow initial increase, a sharp decline followed by a shallow slow recovery. The initial and late slow rates of volume increase result from Na/K pump inhibition, as may be shown by re-running the vanadate protocol without Na/K pump inhibition. The reason for such slow rates of volume change and cation gradient dissipation is the extremely low permeability of the RBC plasma membrane to  $Na^+$ ,  $K^+$ , and to cations in general, an evolutionary optimized condition allowing RBC volume maintenance with minimal pump-leak turnover rates and energy consumption (31).

The sharp volume fall during the second phase results from Gardos channel activation (Fig 5D). The delay is caused by the slow increase in  $[Ca_T]_i$  and  $[Ca^{2+}]_i$  following PMCA inhibition (Fig 5B). The low  $Ca^{2+}$  permeability of the RBC membrane limits the rate at which  $[Ca_T]_i$  increases, and cytoplasmic  $Ca^{2+}$  buffering further reduces the scale of the  $[Ca^{2+}]_i$  increase which is the direct signal for Gardos channel activation. Figures 5C and 5D show the time-course associated with hyperpolarization and channel-mediated  $K^+$  flux, respectively. It can be seen (Fig 5C) that the membrane potential follows closely the anion equilibrium potential throughout all the periods, reflecting the dominance of anion conductance in the RBC membrane (46-48). The  $E_m-E_A-E_K$  convergence in the end (Fig 5C) reflects the new ion-gradient distribution generated after full dissipation of the  $K^+$  gradient. The  $K^+$  efflux curve through the Gardos channel (Fig 5D) shows a biphasic pattern, first a  $Ca^{2+}$ -activated increase followed by a decline as the  $K^+$  concentration gradient dissipates.

Interested readers may wish to explore further and compare the Gardos effect response described here with that elicited by sudden  $K^+$  permeabilization of RBCs. Sudden  $K^+$  permeabilization can be elicited experimentally by addition of valinomycin (3, 49), a potassium-selective ionophore, as simulated with the protocols of Figs 4C to 4G, or by addition of a  $Ca^{2+}$  ionophore (50-52). Note the sharp differences in the rate and magnitude of changes in membrane potential and other variables between different  $K^+$ -permeabilization protocols.

***Predicted time-course of changes in RBC pH and system osmolarity following  $K^+$  permeabilization.*** A first set of predictions, totally unsuspected when originally advanced (2), concerned changes in cell and medium pH, with cell acidification and medium alkalisation (Fig 6A), predictions experimentally validated in a variety of experimental conditions (3, 16). Their mechanism is explained in the Discussion. The biphasic time-course predicted for the net  $H^+$  flux in this protocol is shown in Fig 6B. Further scrutiny of csv-file data shows that net  $K^+$  flux exceeds net  $Cl^-$  efflux, and that flux electroneutrality is made up by  $H^+$  influx, with the appearance of an electroneutral  $K^+:H^+$  exchange, misattributed to a real electroneutral  $K^+:H^+$  antiport in the past (53-55). Its phantom nature was exposed by the original model which, lacking this transporter, predicted the observed experimental results used in its support and explained the complex mechanisms behind its appearance.

A second set of unexpected predictions concerned system osmolarity (Fig 6C). The model predicts that cell dehydration driven by net KCl loss elevates cell and medium osmolarity as if new osmotic particles were generated within the cells and redistributed between cells and medium. Moreover, the model predicts that the increase in global system osmolarity will be higher the higher the cell fraction, an effect the reader is invited to explore further (Fig 4G).

## Discussion

We introduced a multiplatform JAVA-based model of human red blood cell homeostasis and applied it here to explore in detail the homeostatic changes induced by activation of Gardos channels while guiding users on how to operate the model.

The deceptive simplicity of the central page (Fig 3) for determining the constitutive properties of the cell in the initial Reference State, and for the design and creation of simulated experimental protocols in the Dynamic State hides an unlimited versatility in the range and scope of questions that can be addressed with the model. Availability of the continually updated code in the online GitHub repository also allows users to extend the



model for specific uses not included in current versions. We hope the accessibility and simplicity of RCM.jar will encourage its use as a frequently consulted tool on questions related to RBC transport and homeostasis in health and disease.

We discuss next the mechanisms concerned with pH and osmolarity changes associated with  $K^+$  permeabilization, good examples of entanglement confounding intuition.

### ***Predicted side-effects of $K^+$ permeabilization of human RBCs***

Let us consider first how the operation of what has become known as the Jacobs-Stewart cycle or mechanism (56, 57) is represented in the model. The JS cycle comprises the parallel operation of the anion exchanger, AE1, as an electroneutral  $Cl^-:HCO_3^-$  antiport, and the  $CO_2$  shunt, as illustrated in Fig7A.

As a rough approximation to a complex multistep process, we may assume that for each  $Cl^-:HCO_3^-$  exchanged through AE1, protonation of the transported  $HCO_3^-$  ion effectively adds a  $CO_2$  molecule to the medium on the membrane side it was transported to. Rapid  $CO_2$  equilibration across the membrane shunts back the  $CO_2$  to the other membrane side releasing a  $H^+$  on hydration. The net result of each half JS cycle is therefore the electroneutral transfer of one  $Cl^-$  with one  $H^+$ , indistinguishable from the operation of an electroneutral  $Cl^-:H^+$  symport. Thus, the complete JS cycle may be represented phenomenologically by an electroneutral  $Cl^-:H^+$  cotransporter, as illustrated in Fig 7B, ignoring the background roles of  $HCO_3^-$  and  $CO_2$ . This phenomenology lumps a large number of steps operating over a vast range of time-scales comprising  $CO_2$  solvation,  $CO_2$  hydration (spontaneous in the extracellular medium and carbonic anhydrase-assisted intracellularly),  $CO_2$  transport, intracellular and extracellular proton buffering, and the complex kinetics of the AE1 exchanger. The  $Cl^-:H^+$  cotransport representation has been shown to accurately describe the operation of the JS cycle at the functional level required for modelling RBC homeostasis. It allows the model to predict pH changes and explain the mechanisms behind all relevant physiological, pathological and experimental RBC responses involving the participation of the JS cycle (3, 5, 13, 14, 16, 58-61). An additional important issue addressed by this phenomenology is that of the “ignored”  $HCO_3^-$  and  $CO_2$  (see Box 5). This oversight, together with the JS cycle phenomenology, also enables the model to be run using a single diffusible anion representation,  $A^-$ , for the combined contents or concentrations of  $Cl^-$  and  $HCO_3^-$ .

**Box 5. The ignored  $HCO_3^-$  and  $CO_2$ .** In most of the experiments with RBC suspensions  $HCO_3^-$  salts are not added to the medium and both  $HCO_3^-$  and  $CO_2$  remain unreported as explicit components of the system. Where then is the  $HCO_3^-$  that keeps the  $Cl^-:HCO_3^-$  exchange in motion and allows the  $Cl^-:H^+$  symport phenomenology to represent the operation of the JS system? Dissolved  $HCO_3^-$  at equilibrium with atmospheric  $CO_2$  is always present in unsealed cell suspensions, and this presence is sufficient to sustain near physiological rates of JS cycle turnover. It can easily be estimated that at an atmospheric pressure of 760 mmHg, a ~ 0.04%  $CO_2$  in environmental air, a solubility constant of  $CO_2$  in water of 0.03mM/mmHg, a pKa of 6.147 for the  $[H^+][HCO_3^-]/[CO_2]$  hydration reaction, and at a pHs of 7.4-7.5, the unreported  $HCO_3^-$  concentration will be around 200  $\mu$ M, more than sufficient to sustain high rates of JS-mediated fluxes.

With over  $10^6$  AE1 units per cell and essentially instant  $CO_2$  equilibration rates across the RBC plasma membrane, the JS mechanism, optimized by evolution for effective  $CO_2$  transport from tissues to lungs, is by far the most important mediator of  $H^+$  transport in RBCs. The JS phenomenology is represented in the model by a low-saturation equation of the form  $F_{ClJS} = F_{HJS} = k_{AE1}([Cl^-]_o[H^+]_o - [Cl^-]_i[H^+]_i)$ , where  $F_{ClJS}$  and  $F_{HJS}$  are the net fluxes of  $Cl^-$  and  $H^+$  through the JS pathway, and  $k_{AE1}$  is the rate constant of AE1 turnover, about

four to six orders of magnitude faster than that of any other ion transporter in the RBC membrane. In the absence of net JS fluxes,  $F_{JS} = 0$ ,  $[Cl^-]_o[H^+]_o = [Cl^-]_i[H^+]_i$ . Defining the concentration ratios  $rA$  and  $rH$  by  $rA = [Cl^-]_o/[Cl^-]_i$  and  $rH = [H^+]_i/[H^+]_o$ , respectively, the equilibrium condition for the JS system at zero net flux will be  $rA = rH$ . The participation of other anion and proton transporters causes deviations from this equality, miniscule in normal steady states. Larger deviations during dynamic states would tend to be speedily restored towards  $rH \approx rA$  by the JS system.

Let us now consider how RBC dehydration caused by  $K^+$  permeabilization affects cell pH and osmolarity from the data stored in GE1.csv, the output file generated from the vanadate protocol simulations (**Box 4**). As the cells start to dehydrate by the net loss of KCl, four confluent changes among many others are particularly relevant for the pH and osmolarity effects: i) the concentration of the impermeant intracellular anion increases (Fig 8A,  $[X^-]$ ); ii) the concentration of haemoglobin increases (Fig 8B,  $[Hb]$ ) and so does its contribution to the net negative intracellular charge (Fig 8B,  $n_{Hb}[Hb]$ ); iii) the osmotic coefficient of haemoglobin increases along a power function of the haemoglobin concentration increasing sharply the osmotic contribution of haemoglobin as dehydration proceeds (Fig 8C), and iv), the intracellular concentration of  $Cl^-$  becomes markedly reduced (Fig 8A,  $[Cl^-]$ ) by net  $Cl^-$  loss, by charge displacement from increasingly concentrated impermeant anions  $X^-$  and  $Hb^-$ , and by water retention due to the increasing colloid osmotic pressure on haemoglobin.

The reduction in  $[Cl^-]$  is the most relevant drive for the pH effects. The resulting increase in  $rA$  will tend to be rapidly equilibrated towards  $rH \approx rA$  through the JS mechanism (Fig 8D), explaining the pH changes shown in Fig 6A. Although cell acidification is buffered by haemoglobin with reduction in its net negative charge per mol,  $n_{Hb}$  (Fig 8B,  $n_{Hb}$ ), the increase in haemoglobin concentration dominates, and its overall contribution to the intracellular negative charge increases with dehydration (Fig 8B,  $n_{Hb}[Hb]$ ). Electroneutrality is strictly preserved through all these changes,  $([Na^+]_i + [K^+]_i + 2[Mg^{2+}]_i = [A^-]_i + [X^-] + n_{Hb}[Hb])$ , and the extra osmotic load generated by haemoglobin crowding (Fig 8C) is rapidly redistributed between cells and medium by an hypertonic KCl + KOH effluent (3). In Box 6 we provide a highly simplified example to illustrate the dehydration-induced acidification mechanism bypassing the complexities generated by macromolecular crowding and proton buffering.

**Box 6. Thought experiment to illustrate how dehydration by KCl loss acidifies cells that express the anion exchanger (AE1) in their plasma membrane.** We imagine a protein-free RBC ghost resealed with 50 mM KGluconate, 100 mM KCl, and 1 mM ATP, suspended in a 150 mM NaCl medium adjusted to a  $pH_o$  of 7.4, equivalent to a  $[H^+]_o$  of  $\sim 40$ nM. Monovalent gluconate is the only impermeant solute in this system. ATP is there to fuel the Na/K pump and balance the passive Na and K leaks to set ghosts initially in a steady state. We add valinomycin to permeabilize the ghost to potassium eliciting its dehydration by potassium gradient-driven loss of an isosmotic KCl effluent. We wait until the ghost dehydrates to half its initial volume ( $V/2$ ) and take note of the change in its composition.

| Cell concentrations (mM) | Initially | After V/2 |
|--------------------------|-----------|-----------|
| Gluconate                | 50        | 100       |
| $Cl^-$                   | 100       | 50        |
| $K^+$                    | 150       | 150       |

With  $rA$  defined by  $rA = [Cl^-]_o/[Cl^-]_i$  and  $rH$  by  $rH = [H^+]_i/[H^+]_o$ , the JS-AE1 mechanism sets  $rH$  to match  $rA$  at a rate determined by AE1 expression and turnover. Therefore, when  $rH \approx rA$ ,

|           | rA  | rH  | $[H^+]_o$ (nM) | $[H^+]_i$ (nM) | pHo | pHi |
|-----------|-----|-----|----------------|----------------|-----|-----|
| Initially | 1.5 | 1.5 | 40             | 60             | 7.4 | 7.2 |
| After V/2 | 3.0 | 3.0 | 40             | 120            | 7.4 | 6.9 |

The dehydration-induced increase in  $rA$  led to a fall in intracellular pH from 7.2 to 6.9 in this example. Cell acidification following dehydration led by chloride salt losses has been documented in cells other than RBCs a tendency common to any cell type expressing the AE1 in its plasma membrane (55).

Haemoglobin crowding (Fig 6C) has three main side-effects: i) it contributes to increase the net negative charge on impermeant cell anions (Fig 8B), ii) it elevates cell and system osmolarity (and osmolality) as a power-function of its concentration (Figs 6C and 8C), and iii) it increases the colloidosmotic pressure within the cells causing water retention and a progressively more hypertonic effluent as part of the redistribution process of permeant ions between cells and medium (Fig 6C). It tempts speculation that this powerful osmotic effect of soluble protein crowding, so easily detectable in a RBC suspensions, may yet be discovered to participate in the fluid dynamics of cells containing compartments with a high concentration of soluble macromolecules.

We can now summarize the sequence of events during the Gardos Effect within the scope of conditions considered in this paper (Fig 9). Running down of cell ATP by the combination of substrate and inhibitor reduces  $Ca^{2+}$  extrusion by the plasma membrane calcium pump. This allows a net build up of the intracellular concentration of free calcium to levels that activate Gardos channels (Figs 5B and 5D). The cell hyperpolarizes to potentials intermediate between those of  $E_K$  and  $E_{Cl}$  (Fig 5C) driving a net loss of KCl. As the cells dehydrate, the intracellular chloride concentration progressively declines (Fig 8A), driving a net entry of chloride and protons through the Jacobs-Stewart mechanism, with cell acidification and medium alkalinisation (Figs 6A and 8D). Concurrently, dehydration progressively increases the osmotic contribution of haemoglobin along a power function (Fig 8E), elevating its colloidosmotic strength, causing water retention and the generation of a progressively hypertonic effluent with overall increase in system osmolarity (Fig 6C), higher the higher the haematocrit of the cell suspension (Fig 4G). Water retention, in turn, contributes to intracellular chloride dilution, an additional contributor to the pH change.

**Acknowledgements:** The background research work on which this investigation was based was supported over four decades by funding agencies in the UK and in the USA (VLL PI or co-PI). **In the UK:** Biotechnology and Biological Sciences Research Council (BB/E008542/1; BB/F001630/1, BB/F001673/1, and BB/H024867/1), Engineering and Physical Sciences Research Council (EP/E059384); The Wellcome Trust (064124; 061269; 059725; 030699; 033876; 15543; 17358; 13056), and The Medical Research Council (G8211073CA). **In the US:** NIH 2-RO1 HL28018-19; 2-RO1 HL21016-11. The authors are grateful to Serge L. Y. Thomas and Daniel J. Lew for helpful comments and suggestions on the material contained in the three manuscripts of this series.

## FIGURES and figure legends

**Figure 1. Flowchart illustrating the approach applied in guiding the design of the red blood cell model and the sequential steps involved in running the model.**

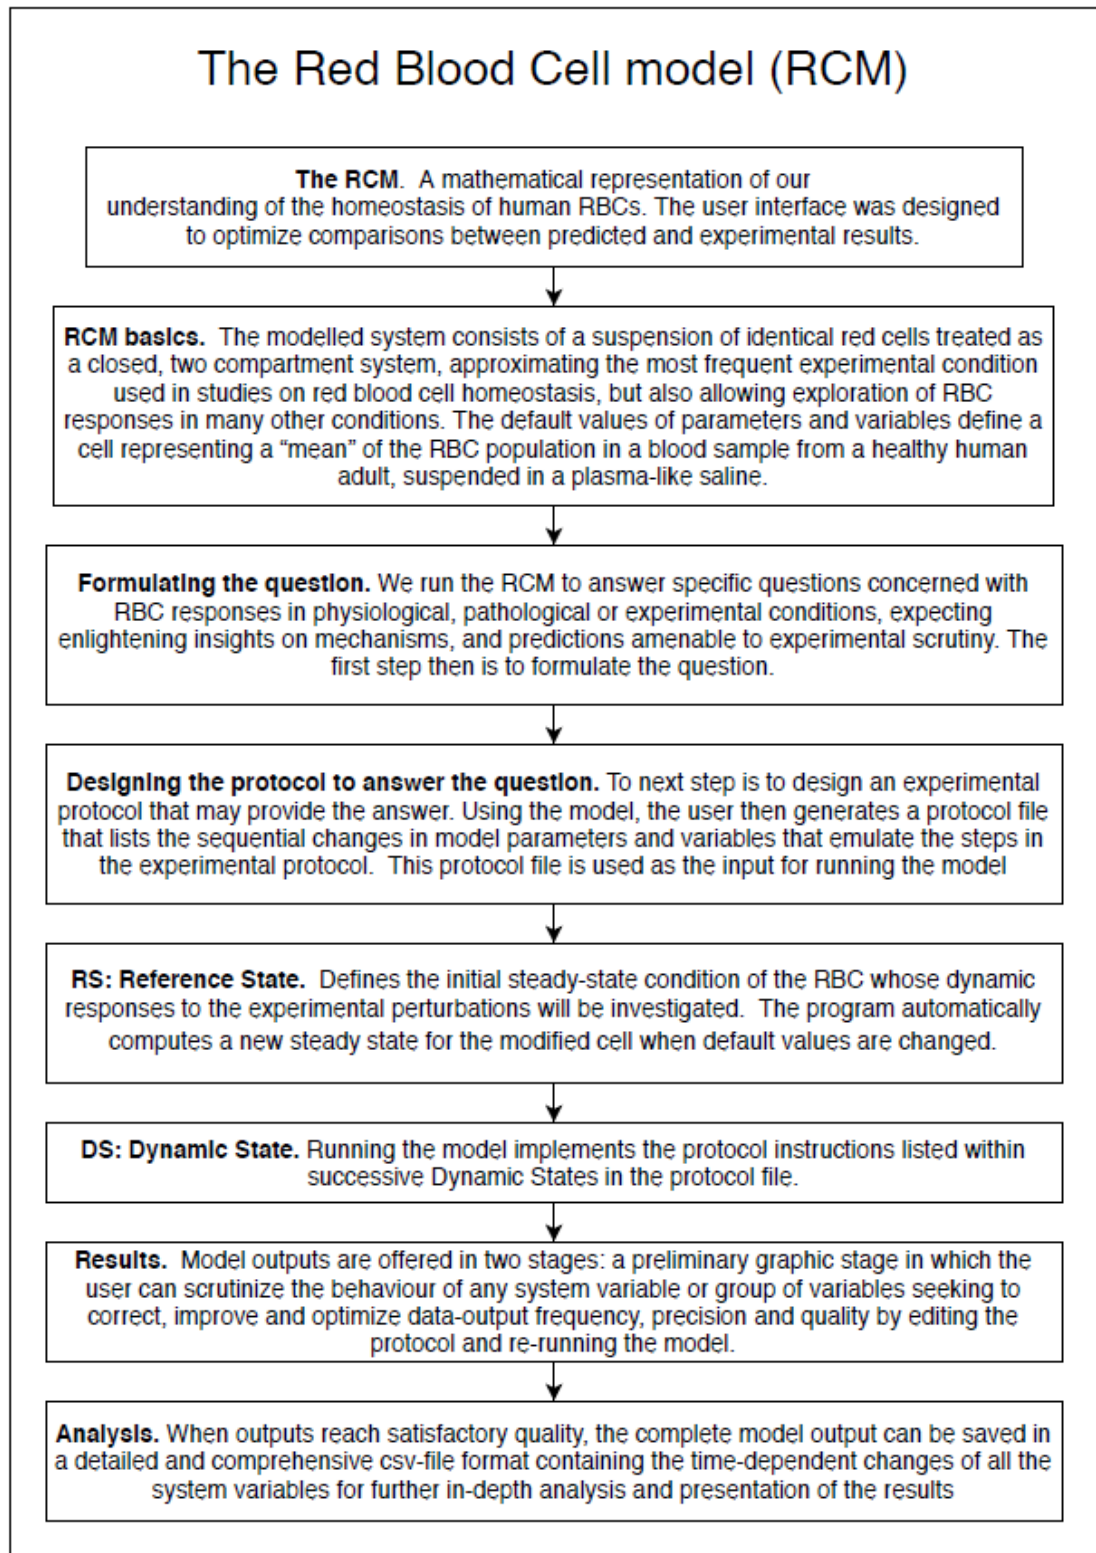

**Figure 2. The Welcome Page.** The figure contains a simplified representation of the main components of the RCM, including PIEZO1. At the bottom of the page the user is offered two tags with alternative options to create a new simulated protocol, “New experiment” (on the left), or to transfer a previously saved protocol file “Load from file” (on the right).

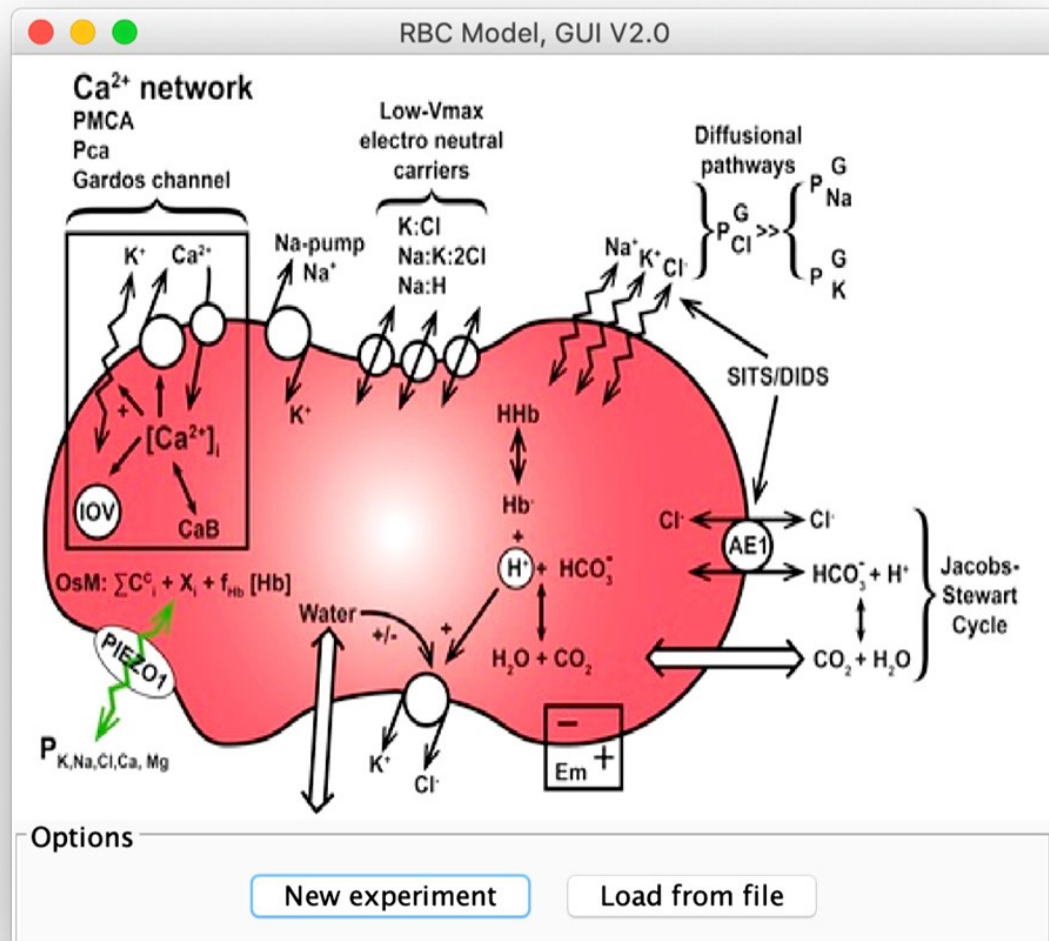



**Figure 3. The Central Page (reduced version), with options for changing the initial (default) constitutive properties of the cell in the Reference State (RS, left panel), and to implement sequential Dynamic States simulating experimental steps (DS, right panel). Detailed operation is explained in boxes 1-4 in the text using an example of a simulated experiment.**

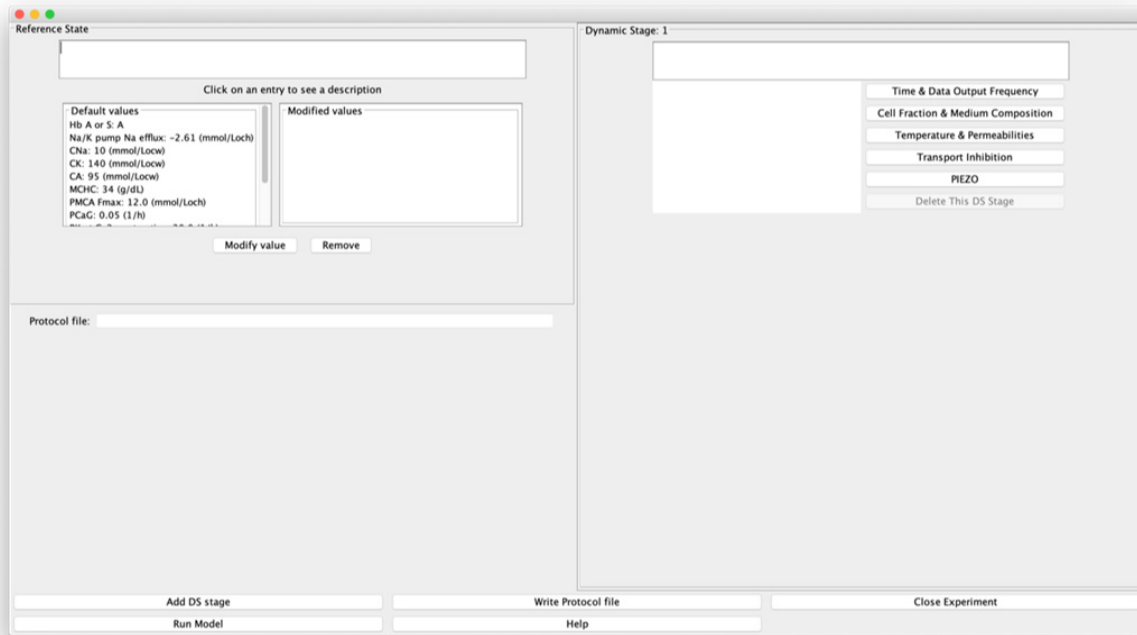



**Figure 4. Alternative protocols. Samples of protocol text files on the K<sup>+</sup>-permeabilization theme.** Users are advised to save result files (csv) for each of these protocols to practise interpreting the mechanisms responsible for the different responses, with particular attention to the following variables: RCV, Em, pHi, rA-rH, COs-MOs, CK, CNa, CA. **A** and **B**: show the original and corrected protocol versions outlined in boxes 3 and 4 of the tutorial, respectively. **A** and **B** are the only protocols explicitly analysed in the text. **C: Effect of valinomycin.** Addition of the K<sup>+</sup>-selective ionophore valinomycin bypasses all calcium-mediated effects. This basic protocol is repeated with variations in all the following examples (D to G). Note the rapid onset of hyperpolarization and dehydration caused by sudden K<sup>+</sup> permeabilization, relative to their slower onset rates under the vanadate-simulated Gardos effect (shown in Figs 5A and 5C). **D: Increased anion permeability (PA in DS2).** Comparison of dehydration rates between protocols **C** and **D** illustrates the powerful rate-limiting effect of the anion permeability on RBC dehydration rate; the electrodiffusional anion permeability can be increased experimentally by replacing 10 mM NaCl with 10 mM NaSCN in the medium (62). **E: Iso-osmotic replacement of 85 mM NaCl for KCl in the medium.** Elevating the medium potassium concentration effectively reduces the driving force for dehydration and for all associated secondary effects. **F: Effects of AE1 inhibitors.** Dehydration remains rapid and profound, but the secondary JS-mediated pH effects are retarded, with rH approaching rA slowly instead of almost instantly as for the un-inhibited AE1 exchanger in the Gardos effect simulations (Fig 8D). **G: Osmotic effects of RBC dehydration explored at high haematocrits.** The cell fraction is set to 0.4 (40% haematocrit) to illustrate how the osmotic effects of haemoglobin crowding become more marked the higher the cell fraction and overall haemoglobin content of the suspension. Compare the COs and MOs variables in conditions **C** (with 0.1 cell volume fraction) and **G**.

|                                                                                                                                                |                                                                                                                                                                     |                                                                                                                                            |                                                                                       |
|------------------------------------------------------------------------------------------------------------------------------------------------|---------------------------------------------------------------------------------------------------------------------------------------------------------------------|--------------------------------------------------------------------------------------------------------------------------------------------|---------------------------------------------------------------------------------------|
| <pre><b>A</b> RS  DS 1 CVF:0.1 Time:30  DS 2 Time:60 % inhibition of Na/K pump FNamax:100 % inhibition/stimulation(-) of PMCA FCamax:100</pre> | <pre><b>B</b> RS  DS 1 Cycles per print:11 CVF:0.1 Time:30  DS 2 Time:600 % inhibition of Na/K pump FNamax:100 % inhibition/stimulation(-) of PMCA FCamax:100</pre> | <pre><b>C</b> RS  DS 1 Cycles per print:11 CVF:0.1 Time:30  DS 2 Time:120 PK:30</pre>                                                      |                                                                                       |
| <pre><b>D</b> RS  DS 1 Cycles per print:11 CVF:0.1 Time:30  DS 2 PA:50 Time:120 PK:30</pre>                                                    | <pre><b>E</b> RS  DS 1 Cycles per print:11 CVF:0.1 Time:30  DS 2 Replace NaCl with KCl:85 Time:120 PK:30</pre>                                                      | <pre><b>F</b> RS  DS 1 Cycles per print:11 CVF:0.1 Time:30  DS 2 Time:120 PK:30 % inhibition/stimulation(-) of JS mediated fluxes:95</pre> | <pre><b>G</b> RS  DS 1 Cycles per print:11 CVF:0.4 Time:30  DS 2 Time:120 PK:30</pre> |

**Figure 5: Predicted changes in selected RBC variables as a function of time following sudden inhibition of the Na/K and calcium pumps by vanadate.** **A:** relative cell volume changes due to Na/K pump inhibition and to delayed activation of Gardos channels by slow  $[Ca^{2+}]_i$  gain; **B:** total ( $[Ca_T]_i$ ) and free ( $[Ca^{2+}]_i$ ) intracellular calcium concentration changes following PMCA inhibition; **C:** Changes in membrane potential,  $E_m$ , and in the equilibrium potentials of  $K^+$  and  $A^-$ ,  $E_K$  and  $E_A$ , respectively, with time-patterns determined by Gardos channel activation kinetics and by ion gradient dissipation; **D:** biphasic net  $K^+$  flux pattern determined by changes in Gardos channel permeability (increasing  $K^+$  efflux phase) and  $K^+$  gradient dissipation (decreasing  $K^+$  efflux phase), with minimal initial and late contributions of Na/K pump inhibition, hardly noticeable on this y-axis scale.

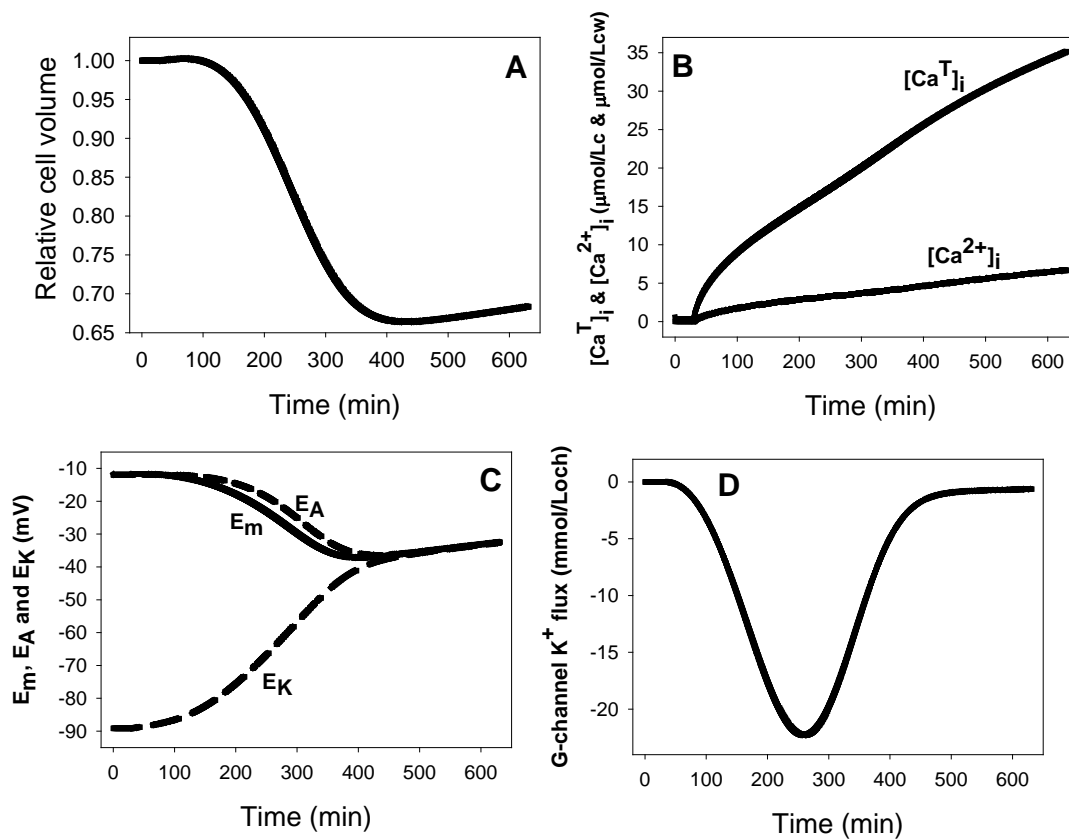

**Figure 6. Predicted changes in pH and system osmolarity following the vanadate protocol.** **A:** Changes in cell and medium pH ( $pH_i$  and  $pH_o$ , respectively) with patterns determined by the changes in  $Cl^-$  concentration ratio,  $rA$ , across the red cell membrane; **B:** biphasic  $H^+$  flux pattern through the JS mechanism driven by the changes in  $rA$ ; **C:** changes in system osmolarity resulting from variations in haemoglobin crowding secondary to cell volume changes.

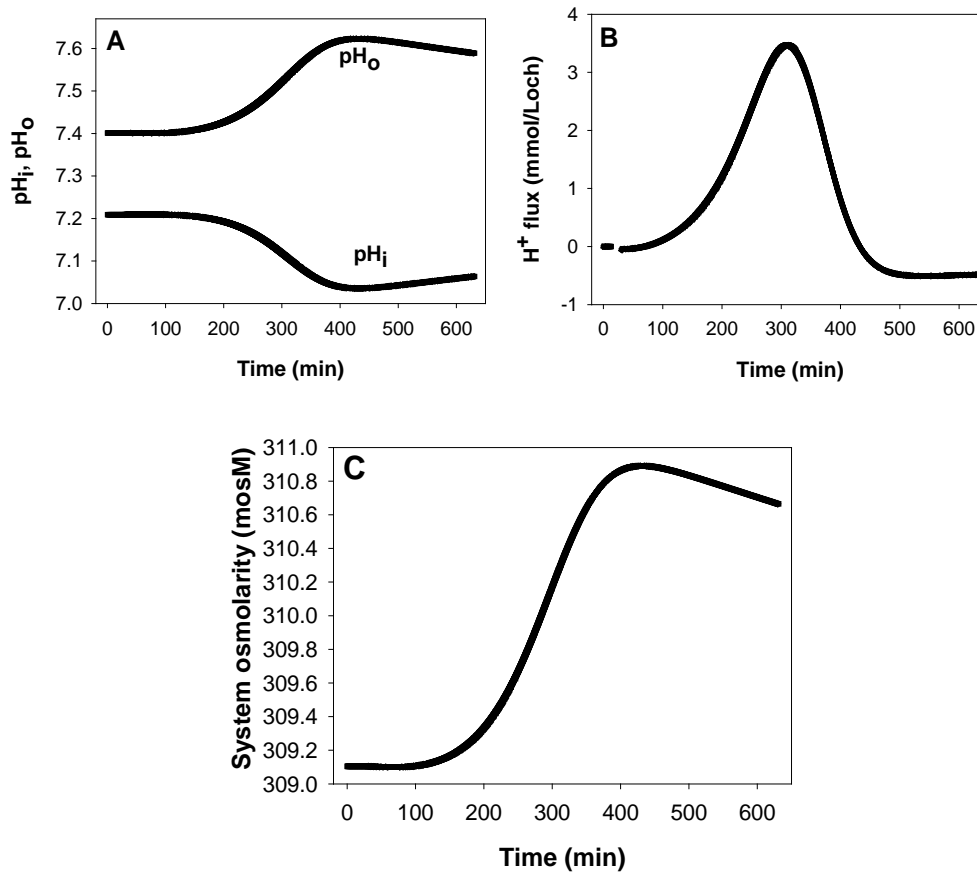

**Figure 7. Representation of the JS cycle as an electroneutral  $\text{Cl}^-:\text{H}^+$  symport.** **A:** The Jacobs-Stewart mechanism showing the combined operation of the anion exchanger, AE1, and the  $\text{CO}_2$  shunt on the transfer of  $\text{H}^+$  ions across the red cell membrane; **B:** equivalent model-representation of  $\text{H}^+$  transport through the JS mechanism as an electroneutral  $\text{Cl}^-:\text{H}^+$  cotransport.

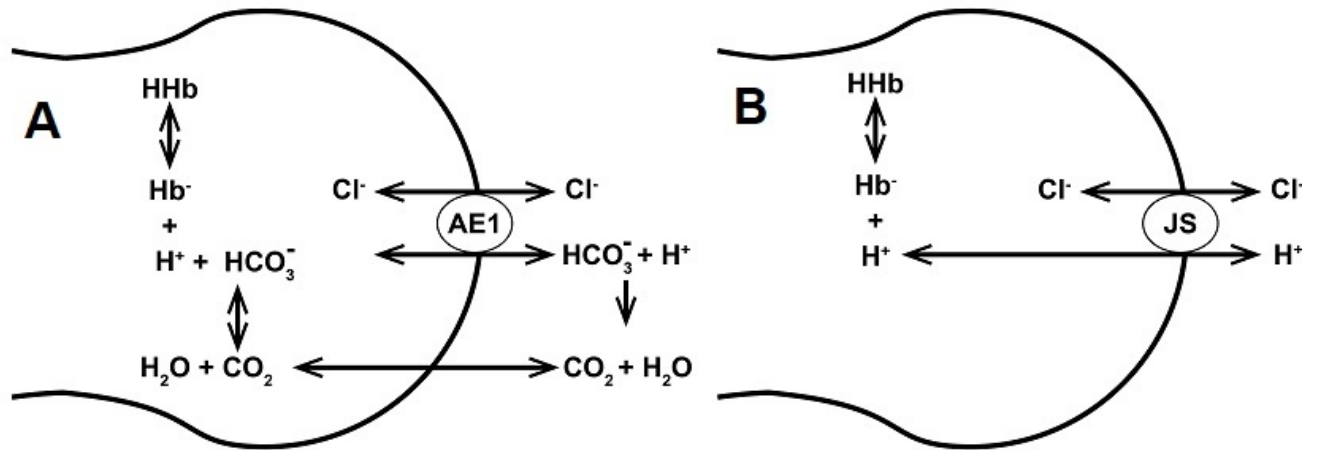

**Figure 8. Predicted effects of macromolecular concentration changes on cell  $\text{Cl}^-$ ,  $\text{H}^+$  and osmolarity.** **A:** Inverse correlation between the changes in the concentrations of cell permeant  $\text{A}^-$  ( $[\text{Cl}^-]$ ,  $[\text{Cl}^-]_i$ ) and of impermeant cell anions ( $[\text{X}^-]$ ) during the Gardos effect. **B:** opposite changes in the charge per mole of haemoglobin ( $n_{\text{Hb}}$ ) and in the charge concentration on haemoglobin ( $n_{\text{Hb}}[\text{Hb}]$ ) during the Gardos effect. **C:** illustrates the powerful effect of the osmotic coefficient of haemoglobin ( $f_{\text{Hb}}$ ) in elevating the osmotic contribution of haemoglobin during concentrative haemoglobin crowding. **D:** overlapping changes in  $r\text{A}^-$  (gray) and  $r\text{H}^+$  (black) during the Gardos effect highlighting the almost instant equilibration of  $r\text{H}^+$  to  $r\text{A}^-$ .

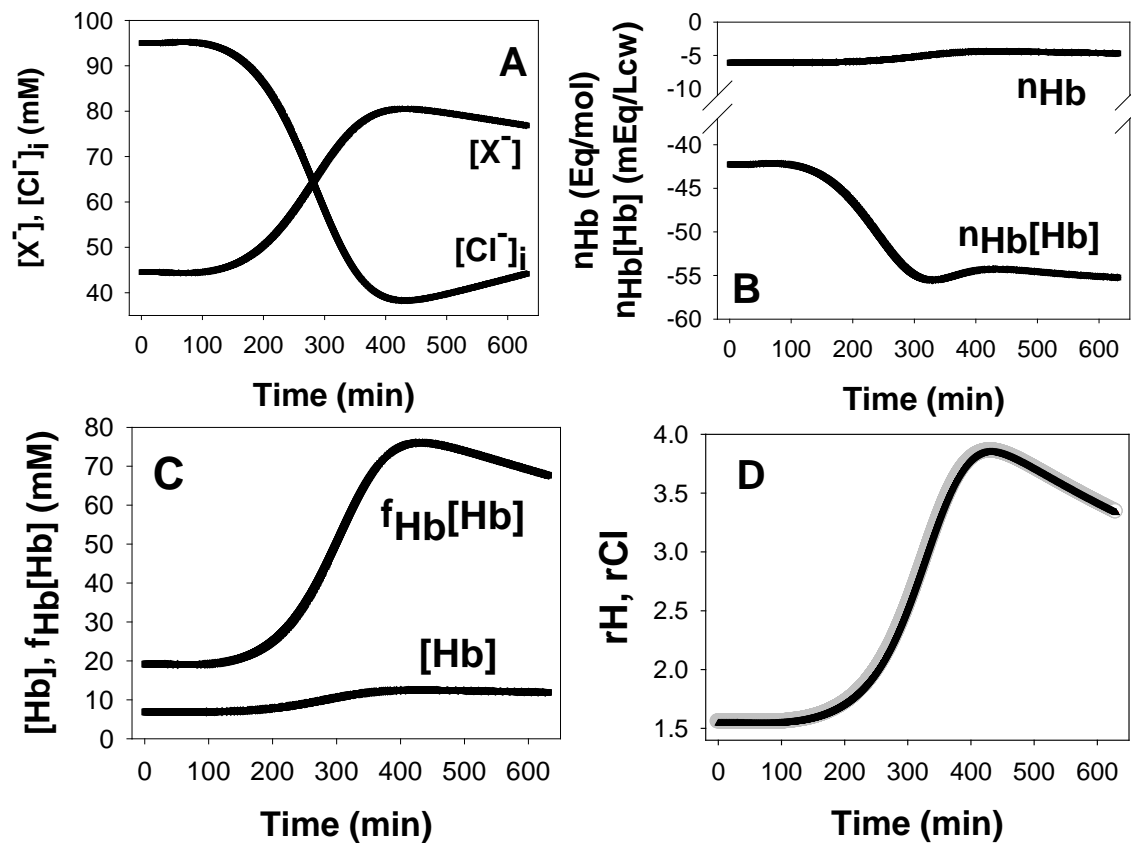

**Figure 9. Illustration of the sequence of effects triggered by the Gardos effect, leading from ATP depletion to cell dehydration and acidification.** Full description in the text.

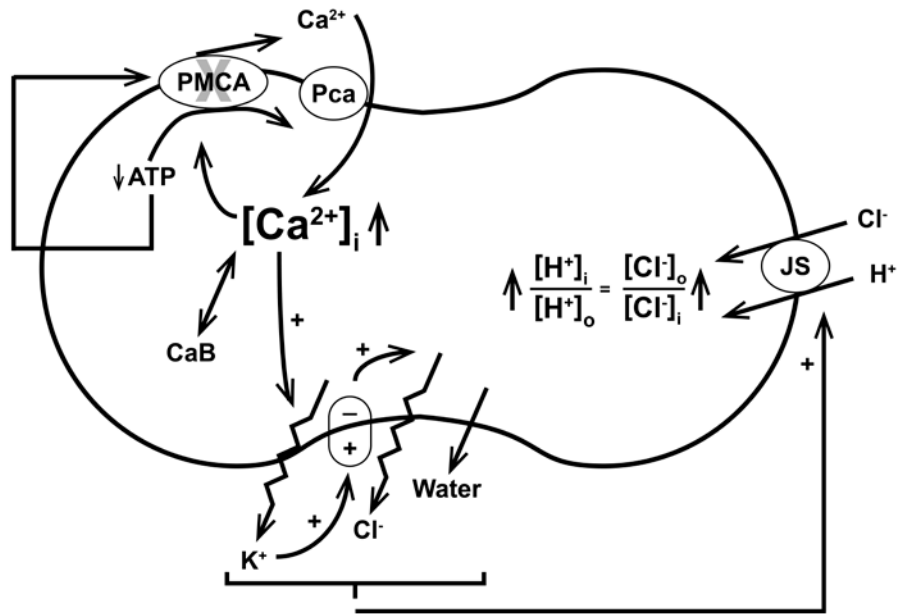



## APPENDIX

- I. Glossary of variable names as in the column sequence of the model output files (\*.csv), with brief description and units
  - II. Computational sequence of the red blood cell model (RCM\*.jar)
  - III. User interface for building simulated experimental protocols
  - IV. HELP pages: Reference State, Dynamic State and PIEZO1 routine
- I. Glossary of variable names as in the column sequence of \*.csv results files, with brief description and units (see explanatory notes at end of Table)

| SYMBOL or NAME    | DESCRIPTION                                                                                  | UNITS            |
|-------------------|----------------------------------------------------------------------------------------------|------------------|
| V/V or RCV        | Cell volume at time t relative to standardized mean cell volume                              | Normalized value |
| Vw                | Volume of cell water in L per litre original cells**                                         | Lcw/Loc          |
| CVF               | Cell volume fraction in cell suspension                                                      |                  |
| Haematocrit,Hct   | Percent volume of suspension occupied by RBCs = CVF*100                                      | %                |
| MCHC              | Mean cell haemoglobin concentration                                                          | g/(dLpc)         |
| Density           | Determined by specific weight of Hb = 1.36 g/mL                                              | g/(mLpc)         |
| Em                | Membrane potential                                                                           | mV               |
| pHi               | Intracellular pH                                                                             |                  |
| pHo               | Medium pH                                                                                    |                  |
| rH                | In/out proton concentration ratio                                                            |                  |
| rA                | Out/in permeant anion concentration ratio (Cl <sup>-</sup> + HCO <sub>3</sub> <sup>-</sup> ) |                  |
| QNa               | Cell Na contents                                                                             | mmol/(340g Hb)   |
| QK                | Cell K contents                                                                              | mmol/(340g Hb)   |
| QA                | Cell permeant anion content (Cl <sup>-</sup> + HCO <sub>3</sub> <sup>-</sup> )               | mmol/(340g Hb)   |
| QCa               | Cell Ca contents                                                                             | mmol/(340g Hb)   |
| QMg               | Cell Mg contents                                                                             | mmol/(340g Hb)   |
| CNa               | Cell Na concentration                                                                        | mmol/(Lcw)       |
| CK                | Cell K concentration                                                                         | mmol/(Lcw)       |
| CA                | Cell permeant anion concentration (Cl <sup>-</sup> + HCO <sub>3</sub> <sup>-</sup> )         | mmol/(Lcw)       |
| CCa <sup>2+</sup> | Cell free ionized Ca <sup>2+</sup> concentration ([Ca <sup>2+</sup> ] <sub>i</sub> )         | mmol/(Lcw)       |
| CMg <sup>2+</sup> | Cell free ionized Mg <sup>2+</sup> concentration ([Mg <sup>2+</sup> ] <sub>i</sub> )         | mmol/(Lcw)       |
| CHb               | Cell Hb concentration                                                                        | mmol/(Lcw)       |
| fHb               | Osmotic coefficient of Hb                                                                    | Osmol/(mol Hb)   |
| nHb               | Net charge on Hb (pHi-dependent)                                                             | mEq/mol          |
| fHb*CHb           | Haemoglobin osmolarity contribution                                                          | mmol/(Lcw)       |
| nHb*CHb           | Total Hb charge concentration                                                                | mEq/(Lcw)        |
| CX-               | Global non-Hb impermeant cell anion concentration                                            | mmol/(Lcw)       |
| nX                | Net charge on global non-Hb impermeant cell anion (X <sup>-</sup> )                          | mEq/mol          |
| nX*CX-            | Total negative charge concentration on X-                                                    | mEq/(Lcw)        |
| COs               | Total cell osmolarity                                                                        | mOsmol/(Lcw)     |

| <b>MOs</b>      | <b>Total medium osmolarity</b>                                                        | <b>mOsmol/L</b>     |
|-----------------|---------------------------------------------------------------------------------------|---------------------|
| <b>MNa</b>      | <b>Medium Na concentration</b>                                                        | <b>mM</b>           |
| <b>MK</b>       | <b>Medium K concentration</b>                                                         | <b>mM</b>           |
| <b>MA</b>       | <b>Medium (Cl<sup>-</sup> + HCO<sub>3</sub><sup>-</sup>) concentration</b>            | <b>mM</b>           |
| <b>MH</b>       | <b>Medium H<sup>+</sup> concentration</b>                                             | <b>nM</b>           |
| <b>MB</b>       | <b>Medium proton buffer concentration</b>                                             | <b>mM</b>           |
| <b>MCat</b>     | <b>Medium total calcium concentration</b>                                             | <b>mM</b>           |
| <b>MCa2+</b>    | <b>Medium free calcium concentration</b>                                              | <b>mM</b>           |
| <b>MMgt</b>     | <b>Medium total magnesium concentration</b>                                           | <b>mM</b>           |
| <b>MMg2+</b>    | <b>Medium free magnesium concentration</b>                                            | <b>mM</b>           |
| <b>MEDGTA</b>   | <b>Medium concentration of EDTA or EGTA</b>                                           | <b>mM</b>           |
| <b>Msucrose</b> | <b>Medium sucrose concentration</b>                                                   | <b>mM</b>           |
| <b>Mgluc--</b>  | <b>Medium gluconate concentration (monovalent impermeant anion)</b>                   | <b>mM</b>           |
| <b>Mgluc+</b>   | <b>Medium glucamine concentration (monovalent impermeant cation)</b>                  | <b>mM</b>           |
| <b>FNaP</b>     | <b>Na flux through the Na pump</b>                                                    | <b>mmol/(Loc*h)</b> |
| <b>FKP</b>      | <b>K flux through the Na pump</b>                                                     | <b>mmol/(Loc*h)</b> |
| <b>FCaP</b>     | <b>Ca flux through the Ca pump (PMCA)</b>                                             | <b>mmol/(Loc*h)</b> |
| <b>FHCaP</b>    | <b>Proton flux through the Ca pump (FHCaP = - 2*FCaP)</b>                             | <b>mmol/(Loc*h)</b> |
| <b>FCaL</b>     | <b>Ca flux through leak pathways (FCaG + carrier (63))</b>                            | <b>mmol/(Loc*h)</b> |
| <b>FNaG</b>     | <b>Net Na flux through electrodiffusional pathway</b>                                 | <b>mmol/(Loc*h)</b> |
| <b>FKG</b>      | <b>Net K flux through electrodiffusional pathway</b>                                  | <b>mmol/(Loc*h)</b> |
| <b>FKGardos</b> | <b>Net K flux through Gardos channel</b>                                              | <b>mmol/(Loc*h)</b> |
| <b>FAG</b>      | <b>Electrodiffusional anion (Cl<sup>-</sup> and HCO<sub>3</sub><sup>-</sup>) flux</b> | <b>mmol/(Loc*h)</b> |
| <b>FHG</b>      | <b>Electrodiffusional H flux (protonophores)</b>                                      | <b>mmol/(Loc*h)</b> |
| <b>FClCo</b>    | <b>Net Cl flux through Na:K:2Cl cotransporter</b>                                     | <b>mmol/(Loc*h)</b> |
| <b>FKCo</b>     | <b>Net K flux through Na:K:2Cl cotransporter</b>                                      | <b>mmol/(Loc*h)</b> |
| <b>FNaCo</b>    | <b>Net Na flux through Na:K:2Cl cotransporter</b>                                     | <b>mmol/(Loc*h)</b> |
| <b>FA23Ca</b>   | <b>Ionophore A23187-mediated net Ca flux</b>                                          | <b>mmol/(Loc*h)</b> |
| <b>FA23Mg</b>   | <b>Ionophore A23187-mediated net Mg flux</b>                                          | <b>mmol/(Loc*h)</b> |
| <b>FNa</b>      | <b>Net Na flux</b>                                                                    | <b>mmol/(Loc*h)</b> |
| <b>FK</b>       | <b>Net K flux</b>                                                                     | <b>mmol/(Loc*h)</b> |
| <b>FA</b>       | <b>Net anion flux</b>                                                                 | <b>mmol/(Loc*h)</b> |
| <b>FH</b>       | <b>Net proton flux</b>                                                                | <b>mmol/(Loc*h)</b> |
| <b>FCa</b>      | <b>Net Ca flux</b>                                                                    | <b>mmol/(Loc*h)</b> |
| <b>Fw</b>       | <b>Net water flux</b>                                                                 | <b>mL/(Loc*h)</b>   |
| <b>EA</b>       | <b>Nernst equilibrium potential for permeant anions</b>                               | <b>mV</b>           |
| <b>EH</b>       | <b>Nernst equilibrium potential for proton ions</b>                                   | <b>mV</b>           |
| <b>EK</b>       | <b>Nernst equilibrium potential for K</b>                                             | <b>mV</b>           |
| <b>ENa</b>      | <b>Nernst equilibrium potential for Na</b>                                            | <b>mV</b>           |
| <b>FzK</b>      | <b>Net K flux through PIEZO1 channel</b>                                              | <b>mmol/(Loc*h)</b> |
| <b>FzNa</b>     | <b>Net Na flux through PIEZO1 channel</b>                                             | <b>mmol/(Loc*h)</b> |
| <b>FzA</b>      | <b>Net anion flux through PIEZO1 channel</b>                                          | <b>mmol/(Loc*h)</b> |
| <b>FzCa</b>     | <b>Net Ca flux through PIEZO1 channel</b>                                             | <b>mmol/(Loc*h)</b> |

|                |                                                                                                        |  |
|----------------|--------------------------------------------------------------------------------------------------------|--|
| <b>EN test</b> | <b>Measures computational error margin for compliance with electroneutrality (departure from zero)</b> |  |
|----------------|--------------------------------------------------------------------------------------------------------|--|

**Notes:**

**Electrodiffusional fluxes (currents):** the non-linear relation between ionic currents and membrane potential is represented in the model with permeabilities defined by the Goldman constant field equation (64).

**Non-standard units: dLpc, mLpc, Lcw, Loc, Loch**

**dLpc, mLpc:** decilitre or mL of packed RBCs; widely used for reporting MCHC results in blood tests

**Lcw:** Litre cell water.

**Loc:** Litre original cells

**Loch:** shorthand for reporting fluxes in mmol per Litre original cells per hour

Loc is a standardized unit widely used in the red blood cell literature for comparing concentrations and fluxes. Based on mean RBC population measurements in healthy adults, Loc assumes a content of 340 g haemoglobin to be contained in 1 Litre of packed RBCs, a standard we adopted to represent the averaged default condition of RBC populations at the start of experiments and model simulations. Thus, for concentrations, mmol/(Loc) is equivalent to mmol/(340g Hb) and for fluxes, mmol/(Loch) is equivalent to mmol/(340g Hbh). In the model, the standardized “mean” cell is defined with a volume of 1L/Loc contains 0.75Lcw/Loc and 0.25LHb/Loc, based on the specific molar weight of Hb of 1.36g/mL (65).

**Rate constants: 1/h, h<sup>-1</sup>.** Permeabilities in the red cell lore, and in the model, are traditionally expressed as rate-constants in units of h<sup>-1</sup>, valid only as constants when referred to the area/volume ratio (A/V) of a standardized RBC. Use of rate-constants in h<sup>-1</sup> units is a remnant from post-WWII decades when tracer flux measurements provided most of the information on the permeability properties of the RBC membrane in preference to the most widely used permeability units (P, in cm/s). Unlike permeabilities in cm/s, rate constants in h<sup>-1</sup> units depend on, and vary with the volume/area of the RBC. For instance, for a RBC with initial volume and area of ~90 μ<sup>3</sup> and ~136 μ<sup>2</sup>, respectively, giving a V/A ratio ~ 0.7 μ we can convert 1h<sup>-1</sup> unit to P, in cm/s using  $P = 1/h * 1/3600 \text{ s/h} * 0.7 \mu * 10^{-4} \text{ cm}/\mu \approx 1.9 * 10^{-8} \text{ cm/s}$ . After dehydration at constant area to a V/A ratio of 0.4, for instance, a rate constant of 1h<sup>-1</sup> would correspond to a permeability of ~ 1.1\*10<sup>-8</sup> cm/s.

## II. COMPUTATIONAL SEQUENCE OF THE RED BLOOD CELL MODEL (RCM.jar)

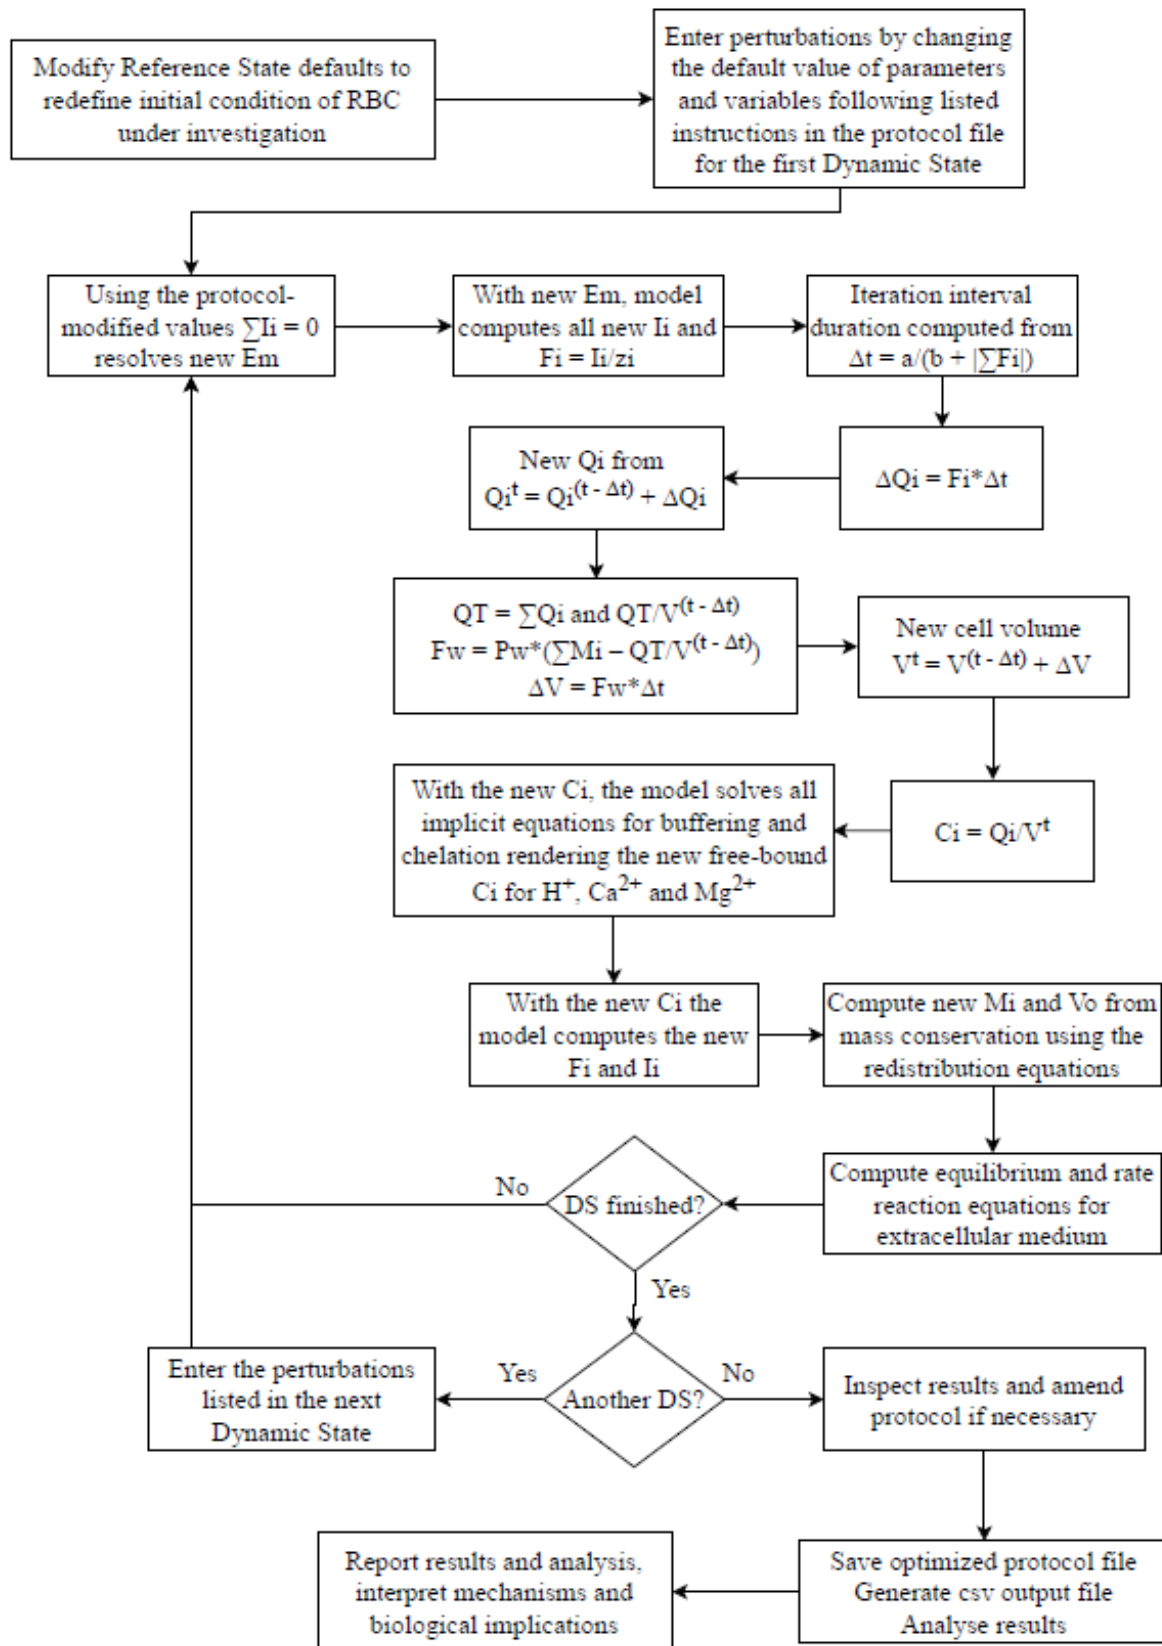

### III. User interface for building simulated experimental protocols

The following Tables list all the entries in Reference (RS) and Dynamic States (DS), with names, brief description of their function, default numerical value, and units. This is how the information appears on the different RS and DS windows. For variables, the same names are used as column headings in the csv output file.

| REFERECE STATE      |                                                                            |         |             |
|---------------------|----------------------------------------------------------------------------|---------|-------------|
| NAME                | DESCRIPTION                                                                | DEFAULT | UNITS       |
| Hb A or S           | Choice of normal Hb A or sickle cell Hb S                                  | A       |             |
| Na/K pump Na efflux | Defines RS pump-leak turnover rate                                         | -2.61   | mmol/(Loch) |
| CNa                 | Initial cell Na <sup>+</sup> concentration                                 | 10      | mmol/Lcw    |
| CK                  | Initial cell K <sup>+</sup> concentration                                  | 140     | mmol/Lcw    |
| CA                  | Initial cell Cl <sup>-</sup> + HCO <sub>3</sub> <sup>-</sup> concentration | 95      | mmol/Lcw    |
| MCHC                | Mean Cell Hb concentration                                                 | 34      | g/(dLpc)    |
| PMCA Fmax           | Calcium efflux through Ca <sup>2+</sup> -saturated pump                    | 12      | mmol/(Loch) |
| PCaG                | Electrodiffusional Ca <sup>2+</sup> permeability                           | 0.05    | 1/h         |
| PKGardos Max        | Electrodiffusional K permeability (Gardos)                                 | 30      | 1/h         |
| KCa Gardos channel  | K <sub>1/2</sub> for Ca <sup>2+</sup> activation of Gardos channel         | 0.01    | mM          |
| Vw                  | Cell water content                                                         | 0.75    | L/Loc       |
| Q10 active          | (F at T+10°C)/(F at T) for active fluxes                                   | 4       |             |
| Q10 passive         | (F at T+10°C)/(F at T) for passive fluxes                                  | 2       |             |

| DYNAMIC STATE: Time and Data Output Frequencies |                                       |         |               |
|-------------------------------------------------|---------------------------------------|---------|---------------|
| NAME                                            | DESCRIPTION                           | DEFAULT | UNITS         |
| Time                                            | Sets the duration of selected DS      | 0       | Minutes       |
| FrequencyFactor                                 | Controls iteration $\Delta t$         | 0.01    |               |
| Cyclesperprint (epochs)                         | Number of cycles between data outputs | 777     | Cycles/output |
| Accuracy                                        | Sets decimal precision in data output | 4       | Decimals      |

| DYNAMIC STATE: Cell Fraction and Medium composition |                                                |         |       |
|-----------------------------------------------------|------------------------------------------------|---------|-------|
| NAME                                                | DESCRIPTION                                    | DEFAULT | UNITS |
| CVF                                                 | Cell Volume Fraction = Haematocrit/100         | 0.00001 |       |
| MB                                                  | Medium HEPES concentration                     | 10      | mM    |
| pHo                                                 | Medium pH                                      | 7.4     |       |
| Na x Glucamine                                      | Isosmotic exchange of Na for impermeant cation | 0       | mM    |
| A x Gluconate                                       | Isosmotic exchange of A for impermeant anion   | 0       | mM    |
| NaCl x KCl                                          | Isosmotic exchange of NaCl for KCl             | 0       | mM    |
| KCl x NaCl                                          | Isosmotic exchange of KCl for NaCl             | 0       | mM    |
| NaCl add/remove                                     | Add/remove NaCl with 2x osmolarity change      | 0       | mM    |
| KCl add/remove                                      | Add/remove KCl with 2x osmolarity change       | 0       | mM    |
| Sucrose add/remove                                  | Add/remove sucrose with 1x osmolarity change   | 0       | mM    |
| MMg                                                 | Medium total Mg concentration                  | 0.2     | mM    |
| MCA                                                 | Medium total Ca concentration                  | 1       | mM    |
| EDGTA 0, 1 or 2                                     | 0=No chelator. G(1) = EGTA; D(2) = EDTA        | 0       |       |
| M <sub>EDGTA</sub>                                  | Medium chelator concentration                  | 0       | mM    |

| DYNAMIC STATE: Temperature and Permeabilities |                             |         |       |
|-----------------------------------------------|-----------------------------|---------|-------|
| NAME                                          | DESCRIPTION                 | DEFAULT | UNITS |
| Temperature                                   | Temperature during DS stage | 37      | °C    |

|                        |                                                         |               |            |
|------------------------|---------------------------------------------------------|---------------|------------|
| <b>Pw</b>              | <b>Water permeability</b>                               | <b>2</b>      | <b>1/h</b> |
| <b>PK</b>              | <b>Electrodifusional K permeability</b>                 | <b>0.0017</b> | <b>1/h</b> |
| <b>PNa</b>             | <b>Electrodifusional Na permeability</b>                | <b>0.0015</b> | <b>1/h</b> |
| <b>PA</b>              | <b>Electrodifusional A permeability</b>                 | <b>1.2</b>    | <b>1/h</b> |
| <b>PH</b>              | <b>Protonophore addition? From 2e-10 to 2e10</b>        | <b>2e-10</b>  | <b>1/h</b> |
| <b>PCa</b>             | <b>Electrodifusional Ca permeability</b>                | <b>0.05</b>   | <b>1/h</b> |
| <b>PA23CaMg</b>        | <b>If added, enter values in the 2e17 to 2e18 range</b> | <b>0.01</b>   |            |
| <b>Hb oxy or deoxy</b> | <b>Changes the oxygenation condition of Hb</b>          | <b>oxy</b>    |            |

| <b>DYNAMIC STATE: Transport inhibition</b> |                                                              |                |              |
|--------------------------------------------|--------------------------------------------------------------|----------------|--------------|
| <b>NAME</b>                                | <b>DESCRIPTION</b>                                           | <b>DEFAULT</b> | <b>UNITS</b> |
| <b>Na/K pump</b>                           | <b>% inhibition of Na/K pump F<sub>Namax</sub></b>           | <b>0</b>       | <b>%</b>     |
| <b>JS cycle</b>                            | <b>% inhibition/stimulation(-) of JS mediated fluxes</b>     | <b>0</b>       | <b>%</b>     |
| <b>PMCA</b>                                | <b>% inhibition/stimulation(-) of PMCA F<sub>Camax</sub></b> | <b>0</b>       | <b>%</b>     |
| <b>Gardos channel</b>                      | <b>% inhibition of Gardos channel F<sub>Kmax</sub></b>       | <b>0</b>       | <b>%</b>     |

| <b>DYNAMIC STATE: Pz, Dedicated PIEZO1 routine for exploring capillary transit effects</b> |                                                     |                |                      |
|--------------------------------------------------------------------------------------------|-----------------------------------------------------|----------------|----------------------|
| <b>NAME</b>                                                                                | <b>DESCRIPTION</b>                                  | <b>DEFAULT</b> | <b>UNITS</b>         |
| <b>Pz stage no or yes</b>                                                                  | <b>Activate PIEZO routine by entering yes</b>       | <b>no</b>      |                      |
| <b>Restore medium (no/yes)</b>                                                             | <b>Prevents carryover of transit medium changes</b> | <b>no</b>      |                      |
| <b>PzOpen state</b>                                                                        | <b>Open state duration during capillary transit</b> | <b>0.4</b>     | <b>Seconds</b>       |
| <b>PzFrequencyFactor</b>                                                                   | <b>Duration of each iteration interval in Pz</b>    | <b>1e-5</b>    |                      |
| <b>Pzcyclesperprint</b>                                                                    | <b>Number of cycles between data output points</b>  | <b>111</b>     | <b>Cycles/output</b> |
| <b>PzK</b>                                                                                 | <b>K permeability through Pz channels</b>           | <b>0</b>       | <b>1/h</b>           |
| <b>PzNa</b>                                                                                | <b>Na permeability through Pz channels</b>          | <b>0</b>       | <b>1/h</b>           |
| <b>PzA</b>                                                                                 | <b>A permeability through Pz channels</b>           | <b>50</b>      | <b>1/h</b>           |
| <b>PzCa</b>                                                                                | <b>Ca permeability through Pz channels</b>          | <b>70</b>      | <b>1/h</b>           |
| <b>Transit CVF</b>                                                                         | <b>Transit cell volume fraction</b>                 | <b>0.9</b>     |                      |
| <b>Pz JS I/S</b>                                                                           | <b>JS Inhibition/Stimulation</b>                    | <b>0</b>       | <b>%</b>             |



#### **IV. HELP pages: (1) The Reference State, (2) The Dynamic State and (3) The PIEZO1 subroutine**

##### ***The Reference State (RS):***

The RS is a steady-state representing the initial condition of a RBC at the start of experiments. Changing default values automatically recalculates a new initial steady-state with equations that ensure compliance with charge and osmotic equilibrium within defined error margins. To approximate the condition of a young RBC, for instance, one could replace the corresponding defaults by CNa 5, CK 145, Vw 0.85 and a FNaP of -3.2.

**HbA or HbS:** HbA and HbS differ in the values of their isoelectric point and net charge per mol,  $a$ . For HbA (default)  $pI(^{\circ}C) = 7.2$  and  $a = -10 \text{ Eq}/(\text{mol} \cdot \Delta(\text{pH} - pI) \text{ unit})$ ; for HbS, the corresponding values are 7.4 and -8. The net charge on Hb at each  $pHi$ ,  $n_{Hb}$ , is computed from  $n_{Hb} = a(pHi - pI)$ , where  $a$  is the slope of the proton titration curve of Hb in Eq/mol, and  $pI$  is the isoelectric pH of Hb.

**Na/K pump Na efflux (FNaP):** Changing the Na flux automatically resets the associated pump-mediated K influx and reverse Na/K fluxes following the stoichiometries and relative forward-reverse flux ratio encoded in the model.

**CNa and CK:** Initial  $\text{Na}^+$  and  $\text{K}^+$  concentrations in cell water (mmol/Lcw)

**CA:** Initial cell  $\text{Cl}^- + \text{HCO}_3^-$  concentration (mmol/Lcw). CA and CCl are used indistinctly throughout.

**MCHC:** “Mean Cell Haemoglobin Concentration”, a common haematological parameter in blood test assays, traditionally reported in gHb/dLoc; MCHC of “mean” model cell = 34 gHb/dL

**PMCA Fmax (FCaPmax):** Maximal  $\text{Ca}^{2+}$  extrusion flux through an ATP and  $\text{Ca}^{2+}$ -saturated plasma membrane calcium pump

**PKGardosMax:** electrodiffusional  $\text{K}^+$  permeability through  $\text{Ca}^{2+}$ -saturated Gardos channels

**KCaGardos channel:** Half-maximal  $\text{Ca}^{2+}$  dissociation constant ( $K_{1/2}$ ) for Gardos channel activation

**Vw:** Water content associated with 340 g Hb; the volume occupied by 340 g Hb at a molar weight of 1.36 g/ml for the Hb tetramer is 0.25 L. The default 0.75 Lcw/Loc for Vw sets a value of 1 L/Loc for the initial volume of the default “reference” RBC.

**Q10 active or passive:** The Q10 factors determine the extent by which active and passive fluxes (F) are set to increase or decrease for each  $10^{\circ}\text{C}$  increase or decrease in temperature, T

## ***The Dynamic State (DS).***

Displays five tabs grouping lists of parameters and variables with default values for constructing one or successive stages in simulated experimental protocols.

### ***Time & Data Output Frequency:***

**Time:** Sets the duration of each DS<sub>n</sub> stage

**FrequencyFactor:** Sets the duration of each iteration interval ( $\Delta t$  at time =  $t$ ) inversely proportional to the absolute value of the sum of all the net fluxes across the cell membrane at time  $t$ . Allows data output frequencies to appear proportional to the rate of change in the system at constant “cyclesperprint” values.

**Cyclesperprint:** sets the number of computational cycles between data output points

**Accuracy:** sets the decimal precision on the output data

### ***Cell fraction and Medium Composition:***

Medium concentrations of X are indicated by MX in mM units. Isosmotic exchanges of X for Y are shown as X x Y. Addition/removals allow changes in medium osmolarity. HEPES, Glucamine, gluconate, sucrose, Mg, EGTA and EDTA are treated as impermeant medium solutes.

**MB:** Medium buffer concentration, HEPES by default

**EDGTA 0, 1, 2:** Prompts for the addition of EGTA (G(1)) or EDTA (D(2)) to the cell suspension.

**M<sub>EDGTA</sub>:** Prompts for the concentration of EGTA or EDTA, if added. The default is 0, no addition.

### ***Temperature & Permeabilities:***

**Notation on the unit used for electrodiffusional ion permeabilities, 1/h or h<sup>-1</sup>:** 1/h is a widely used permeability unit in the RBC literature. For permeability comparisons between membranes from different cell types the most widely used unit is cm/s. For RBCs, both units are related through  $P_{\text{cm/s}} = P_{1/h} * (V/A)/3600$ , where V and A correspond to the RBC volume and membrane area (in cm units) at the time the permeability measurement was taken.

**PHG:** PHG was modelled to enable simulations of the effects of protonophore additions. The default value represents no protonophore present. To simulate observed effects change PHG from 2e-1- to 2e10.

**PA23CaMg:** Ionophore A23187 mediates electroneutral  $X^{2+}:2H^+$  exchanges with well defined highly non-linear kinetics in human RBCs. The default value represents absence of ionophore. To simulate the effects of ionophore concentrations capable of generating a  $Ca^{2+}$  flux exceeding that of the PMCA F<sub>max</sub> at medium  $Ca^{2+}$  concentrations around 0.2 mM use values around 2e18.

**Hb pI(0°C) oxy(7.2), deoxy(7.5):** Hb is assumed to be in a oxygen-saturated condition by default (oxy). **Deoxygenation of Hb** (deoxy) changes its pI(0°C) from 7.2 to 7.5. The model automatically adjusts the actual pI change for the temperature of the experiment. The pI shifts during oxy-deoxy transitions cause changes in the protonization condition of Hb with secondary pHi changes which the model accurately predicts.

### ***Transport inhibition/stimulation (%; defaults = 0):***

The default F<sub>max</sub> value for each transporter, F<sub>m</sub>, is modified according to  $F_m * (100 - X) / 100$  where X is the % inhibition entered at the prompt. F<sub>m</sub> stays modified in successive DS stages unless modified again. Entries in successive DSs always apply to the original default (0%). To return to the original uninhibited F<sub>m</sub> enter “0”. The same equation delivers

stimulation if you enter negative numbers. It applies to JS and PMCA entries only. For an n-fold stimulation, enter “-n\*100”, for instance “-200” for a two-fold stimulation. In the model, the intrinsic electrodiffusional anion permeability of the RBC, PA, is treated as a permeability pathway independent of the anion exchanger, thus preventing prejudged linkage associations when implementing the JS inhibition/stimulation subroutine (3).

## *The PIEZO1 routine*

All the membrane transporters represented in the red cell model are active all the time and participate to different extents in the dynamic responses to perturbations. PIEZO1 is unique in that it is generally inactive by default, responding only to conditions eliciting cell deformation, for instance during capillary transits. The dedicated PIEZO tag allows exploration of the potential effects of PIEZO1 activation during capillary transits. Preliminary tests showed that because of the brief duration of each transit (less than 1s), the magnitude of the changes in model variables was extremely small even attributing extremely high permeabilities to PIEZO1 mediation. This required a substantial increase in decimal accuracy and in the density of data acquisition. The tag offers a protocol design with defaults open to change by the user, as outlined next.

1. In a DS selected for PIEZO1 implementation start by assigning to it a duration of 5min (Time: 5 (min))
2. Double click on the “Incorporate PIEZO stage: no” and enter “yes”
3. This brings up a predesigned DS stage with the following defaults or assignments:
  - 1) Incorporate PIEZO stage: yes
  - 2) Open state: 0.4 (s)
  - 3) Pz accuracy: 6
  - 4) Pz frequency factor: 1e-5
  - 5) Pz cycles per print: 111
  - 6) PzK: 0 (1/h)
  - 7) PzNa: 0 (1/h)
  - 8) PzA: 50 (1/h)
  - 9) PzCa: 70 (1/h)
  - 10) Pz Transit cell volume fraction: 0.9
  - 11) Pz JS Inhibition/Stimulation: 0%
  - 12) Pz Restore Medium: Yes

Pz identifies PIEZO-related parameters and variables. The default five-minute duration of the PIEZO1 DS stage covers three consecutive periods: an initial two-minute baseline control, a PIEZO1 open state period, and a PIEZO1 closure period for the remainder time to five minutes to allow assessment of the short-term reversibility of the changes induced during the open state. Pz accuracy determines the decimal precision of data output in the csv file. Pz frequency factor and Pz cycles per print determine the density of data output over this period. The PzX values list the electrodiffusional permeabilities assigned by default to K<sup>+</sup>, Na<sup>+</sup>, Cl<sup>-</sup>, and Ca<sup>2+</sup> in the open state. The precise ion selectivity, conductance and inactivation kinetics with which PIEZO1 channels operate in human RBCs is unknown at present. The default permeability values chosen render model outcomes in conformity with the scarce but solid experimental evidence available in RBCs (47, 48, 66), as extensively analysed and discussed in the next two papers of this series (29, 30). The value of 0.9 used for the cell volume fraction applies strictly for the duration assigned to the capillary transit, to approximate the squeezed transit condition of the RBCs between the highly diluted (CFV ~ 0.00001) conditions in the systemic circulation before and after transits. The infinite reservoir composition of the medium representing the systemic circulation is preserved by the Restore Medium subroutine. The Pz JS Inhibition/Stimulation option enables study of the possible effects of anion-proton equilibration rates through the Jacobs-Stewart mechanism during capillary transits.

## REFERENCES

1. Lew VL, Ferreira HG, and Moura T. The behaviour of transporting epithelial cells. I. Computer analysis of a basic model. *Proc R Soc London B*. 1979;206(53-83).
2. Lew VL, and Bookchin RM. Volume, pH, and ion-content regulation in human red cells: analysis of transient behavior with an integrated model. *J Membr Biol*. 1986;92(1):57-74.
3. Freeman CJ, Bookchin RM, Ortiz OE, and Lew VL. K-permeabilized human red cells lose an alkaline, hypertonic fluid containing excess K over diffusible anions. *J Membrane Biol*. 1987;96(235-41).
4. Lew VL, Freeman CJ, Ortiz OE, and Bookchin RM. A mathematical model of the volume, pH, and ion content regulation in reticulocytes. Application to the pathophysiology of sickle cell dehydration. *J Clin Invest*. 1991;87(1):100-12.
5. Bookchin RM, Ortiz OE, and Lew VL. Evidence for a direct reticulocyte origin of dense red cells in sickle cell anemia. *Journal of Clinical Investigation*. 1991;87(113-24).
6. Lew VL, Tiffert T, and Ginsburg H. Excess hemoglobin digestion and the osmotic stability of *Plasmodium falciparum*-infected red blood cells. *Blood*. 2003;101(4189-94).
7. Mauritz JM, Esposito A, Ginsburg H, Kaminski CF, Tiffert T, and Lew VL. The homeostasis of *Plasmodium falciparum*-infected red blood cells. *PLoS Comput Biol*. 2009;5(4):e1000339.
8. Hills A, Chen ZH, Amtmann A, Blatt MR, and Lew VL. OnGuard, a computational platform for quantitative kinetic modeling of guard cell physiology. *Plant Physiol*. 2012;159(3):1026-42.
9. Jezek M, Hills A, Blatt MR, and Lew VL. A constraint-relaxation-recovery mechanism for stomatal dynamics. *Plant Cell Environ*. 2019;42(8):2399-410.
10. Minguet-Parramona C, Wang Y, Hills A, Violet-Chabrand S, Griffiths H, Rogers S, Lawson T, Lew VL, and Blatt MR. An Optimal Frequency in Ca<sup>2+</sup> Oscillations for Stomatal Closure Is an Emergent Property of Ion Transport in Guard Cells. *Plant Physiol*. 2016;170(1):33-42.
11. Violet-Chabrand S, Hills A, Wang Y, Griffiths H, Lew VL, Lawson T, Blatt MR, and Rogers S. Global Sensitivity Analysis of OnGuard Models Identifies Key Hubs for Transport Interaction in Stomatal Dynamics. *Plant Physiol*. 2017;174(2):680-8.
12. Lew VL, and Bookchin RM. Ion transport pathology in the mechanism of sickle cell dehydration. *Physiol Rev*. 2005;85(1):179-200.
13. Etzion Z, Tiffert T, Bookchin RM, and Lew VL. Effects of deoxygenation on active and passive Ca<sup>2+</sup> transport and on the cytoplasmic Ca<sup>2+</sup> levels of sickle cell anemia red cells. *Journal of Clinical Investigation*. 1993;92(2489-98).
14. Tiffert T, Etzion Z, Bookchin RM, and Lew VL. Effects of deoxygenation on active and passive Ca<sup>2+</sup> transport and cytoplasmic Ca<sup>2+</sup> buffering in normal human red cells. *J Physiol*. 1993;464(529-44).
15. Raftos JE, Lew VL, and Flatman PW. Refinement and evaluation of a model of Mg<sup>2+</sup> buffering in human red cells. *Eur J Biochem*. 1999;263(3):635-45.
16. Swietach P, Tiffert T, Mauritz JM, Seear R, Esposito A, Kaminski CF, Lew VL, and Vaughan-Jones RD. Hydrogen ion dynamics in human red blood cells. *J Physiol*. 2010;588(Pt 24):4995-5014.
17. Esposito A, Choimet JB, Skepper JN, Mauritz JM, Lew VL, Kaminski CF, and Tiffert T. Quantitative imaging of human red blood cells infected with *Plasmodium falciparum*. *Biophys J*. 2010;99(3):953-60.

18. Mauritz JM, Seear R, Esposito A, Kaminski CF, Skepper JN, Warley A, Lew VL, and Tiffert T. X-ray microanalysis investigation of the changes in Na, K, and hemoglobin concentration in plasmodium falciparum-infected red blood cells. *Biophys J*. 2011;100(6):1438-45.
19. Tiffert T, and Lew VL. Cytoplasmic calcium buffers in intact human red cells. *J Physiol*. 1997;500 ( Pt 1)(139-54).
20. Alper SL. Genetic Diseases of PIEZO1 and PIEZO2 Dysfunction. *Curr Top Membr*. 2017;79(97-134).
21. Andolfo I, Alper SL, De Franceschi L, Auriemma C, Russo R, De Falco L, Vallefucio F, Esposito MR, Vandorpe DH, Shmukler BE, et al. Multiple clinical forms of dehydrated hereditary stomatocytosis arise from mutations in PIEZO1. *Blood*. 2013;121(19):3925-35, S1-12.
22. Bae C, Gnanasambandam R, Nicolai C, Sachs F, and Gottlieb PA. Xerocytosis is caused by mutations that alter the kinetics of the mechanosensitive channel PIEZO1. *Proc Natl Acad Sci U S A*. 2013;110(12):E1162-8.
23. Cahalan SM, Lukacs V, Ranade SS, Chien S, Bandell M, and Patapoutian A. Piezo1 links mechanical forces to red blood cell volume. *Elife*. 2015;4(
24. Danielczok JG, Terriac E, Hertz L, Petkova-Kirova P, Lautenschlager F, Laschke MW, and Kaestner L. Red Blood Cell Passage of Small Capillaries Is Associated with Transient Ca(2+)-mediated Adaptations. *Front Physiol*. 2017;8(979).
25. Svetina S, Svelc Kebe T, and Bozic B. A Model of Piezo1-Based Regulation of Red Blood Cell Volume. *Biophys J*. 2019;116(1):151-64.
26. Gnanasambandam R, Rivera A, Vandorpe DH, Shmukler BE, Brugnara C, Snyder LM, Andolfo I, Iolascon A, Silveira PA, Hamerschlak N, et al. Increased Red Cell KCNN4 Activity in Sporadic Hereditary Xerocytosis Associated With Enhanced Single Channel Pressure Sensitivity of PIEZO1 Mutant V598M. *Hemasphere*. 2018;2(5):e55.
27. Kuchel PW, and Shishmarev D. Accelerating metabolism and transmembrane cation flux by distorting red blood cells. *Sci Adv*. 2017;3(10):eaao1016.
28. Rivera A, Vandorpe DH, Shmukler BE, Andolfo I, Iolascon A, Archer NM, Shabani E, Auerbach M, Hamerschlak N, Morton J, et al. Erythrocyte ion content and dehydration modulate maximal Gardos channel activity in KCNN4 V282M/+ hereditary xerocytosis red cells. *Am J Physiol Cell Physiol*. 2019;317(2):C287-C302.
29. Rogers S, and Lew VL. II. Changes in the homeostasis of human red blood cells during capillary transits. 2020.
30. Rogers S, and Lew VL. III. Unravelling the basis for the extended circulatory lifespan of human red blood cells and for the generation of the hyperdense collapse of irreversibly sickled cells. 2020.
31. Lew VL, and Tiffert T. On the Mechanism of Human Red Blood Cell Longevity: Roles of Calcium, the Sodium Pump, PIEZO1, and Gardos Channels. *Front Physiol*. 2017;8(977).
32. Gardos G. The function of calcium in the potassium permeability of human erythrocytes. *Biochim Biophys Acta*. 1958;30(653-4).
33. Gardos G. Effect of ethylenediaminetetraacetate on the permeability of human erythrocytes. *Acta Physiol Acad Sci Hung*. 1958;14(1):1-5.
34. Gardos G. The role of calcium in the potassium permeability of human erythrocytes. *Acta Physiol Acad Sci Hung*. 1959;15(2):121-5.
35. Lew VL. On the ATP dependence of the Ca<sup>2+</sup>-induced increase in K<sup>+</sup> permeability observed in human red cells. *Biochim Biophys Acta*. 1971;233(827-30).



36. Lew VL. Effect of ouabain on the  $\text{Ca}^{2+}$ -dependent increase in  $\text{K}^{+}$  permeability in depleted guinea-pig red cells. *Biochim Biophys Acta*. 1971;249(236-9).
37. Lew VL, and Ferreira HG. In: Kleinzeller A, and Bronner F eds. *Current Topics in Membranes and Transport, Vol 10*. Academic Press, NY; 1978:217-77.
38. Schatzmann HJ. ATP-dependent  $\text{Ca}^{++}$ -extrusion from human red cells. *Experientia*. 1966;22(6):364-5.
39. Zambo B, Varady G, Padanyi R, Szabo E, Nemeth A, Lango T, Enyedi A, and Sarkadi B. Decreased calcium pump expression in human erythrocytes is connected to a minor haplotype in the ATP2B4 gene. *Cell Calcium*. 2017;65(73-9).
40. Shen SC, Fleming EM, Castle AB, and Castle WB. Studies on the destruction of red blood cells. V. Irreversibly sickled erythrocytes: Their experimental production in vitro. *Blood*. 1949;4(498-504).
41. Bertles JF, and Milner PFA. Irreversibly sickled erythrocytes: a consequence of the heterogeneous distribution of hemoglobin types in sickle cell anemia. *Journal of Clinical Investigation*. 1968;47(1731-41).
42. Fermo E, Bogdanova A, Petkova-Kirova P, Zaninoni A, Marcello AP, Makhro A, Hanggi P, Hertz L, Danielczok J, Vercellati C, et al. 'Gardos Channelopathy': a variant of hereditary Stomatocytosis with complex molecular regulation. *Sci Rep*. 2017;7(1):1744.
43. Rivera A, Vandorpe DH, Shmukler BE, Gallagher DR, Fikry CC, Kuypers FA, Brugnara C, Snyder LM, and Alper SL. Erythrocytes from hereditary xerocytosis patients heterozygous for KCNN4 V282M exhibit increased spontaneous Gardos channel-like activity inhibited by senicapoc. *Am J Hematol*. 2017;92(6):E108-E10.
44. Cantley LC, Jr., Josephson L, Warner R, Yanagisawa M, Lechene C, and Guidotti G. Vanadate is a potent (Na,K)-ATPase inhibitor found in ATP derived from muscle. *J Biol Chem*. 1977;252(21):7421-3.
45. Tiffert T, and Lew VL. Kinetics of inhibition of the plasma membrane calcium pump by vanadate in intact human red cells. *Cell Calcium*. 2001;30(5):337-42.
46. Hunter MJ. Human erythrocyte anion permeabilities measured under conditions of net charge transfer. *J Physiol*. 1977;268(35-49).
47. Glogowska E, Dyrda A, Cuff A, Bouyer G, Egee S, Bennekou P, and Thomas SL. Anion conductance of the human red cell is carried by a maxi-anion channel. *Blood Cells Mol Dis*. 2010;44(4):243-51.
48. Thomas SL, Bouyer G, Cuff A, Egee S, Glogowska E, and Ollivaux C. Ion channels in human red blood cell membrane: actors or relics? *Blood Cells Mol Dis*. 2011;46(4):261-5.
49. Cockrell RS, Harris EJ, and Pressman BC. Energetics of potassium transport in mitochondria induced by valinomycin. *Biochemistry*. 1966;5(7):2326-35.
50. Pressman BC. Ionophorous antibiotics as models for biological transport. *Fed Proc*. 1968;27(6):1283-8.
51. Dagher G, and Lew VL. Maximal calcium extrusion capacity and stoichiometry of the human red cell calcium pump. *J Physiol*. 1988;407(569-86).
52. Pereira AC, Samellas D, Tiffert T, and Lew VL. Inhibition of the calcium pump by high cytosolic  $\text{Ca}^{2+}$  in intact human red blood cells. *J Physiol*. 1993;461(63-73).
53. Cala PM. Cell volume regulation by Amphiuma red blood cells. The role of  $\text{Ca}^{2+}$  as a modulator of alkali metal/ $\text{H}^{+}$  exchange. *J Gen Physiol*. 1983;82(6):761-84.
54. Cala PM. Volume regulation by Amphiuma red blood cells. The membrane potential and its implications regarding the nature of the ion-flux pathways. *J Gen Physiol*. 1980;76(6):683-708.

55. Hoffmann EK, and Simonsen LO. Membrane mechanisms in volume and pH regulation in vertebrate cells. *Physiol Rev.* 1989;69(2):315-82.
56. Jacobs MH, and Stewart DR. The role of carbonic anhydrase in certain ionic exchanges involving the erythrocyte. *J Gen Physiol.* 1942;25(539-52).
57. Hladky SB, and Rink TJ. In: Ellory JC, and Lew VL eds. *Membrane transport in Red Cells.* London: Academic Press; 1977:115-35.
58. Jarvis HG, Gore DM, Briggs C, Chetty MC, and Stewart GW. Cold storage of 'cryohydrocytosis' red cells: the osmotic susceptibility of the cold-stored erythrocyte. *Br J Haematol.* 2003;122(5):859-68.
59. Raftos JE, and Lew VL. Effect of intracellular magnesium on calcium extrusion by the plasma membrane calcium pump of intact human red cells. *J Physiol.* 1995;489(63-72).
60. Waldecker M, Dasanna AK, Lansche C, Linke M, Srismith S, Cyrklaff M, Sanchez CP, Schwarz US, and Lanzer M. Differential time-dependent volumetric and surface area changes and delayed induction of new permeation pathways in *P. falciparum*-infected hemoglobinopathic erythrocytes. *Cell Microbiol.* 2017;19(2).
61. Staines HM, Ellory JC, and Kirk K. Perturbation of the pump-leak balance for Na<sup>+</sup> and K<sup>+</sup> in malaria- infected erythrocytes. *Am J Physiol Cell Physiol.* 2001;280(6):C1576-C87.
62. García-Sancho J, and Lew VL. Detection and separation of human red cells with different calcium contents following uniform calcium permeabilization. *J Physiol.* 1988;407(505-22).
63. Tiffert T, Garcia-Sancho J, and Lew VL. Irreversible ATP depletion caused by low concentrations of formaldehyde and of calcium-chelator esters in intact human red cells. *Biochim Biophys Acta.* 1984;773(1):143-56.
64. Goldman DE. Potential, Impedance, and Rectification in Membranes. *J Gen Physiol.* 1943;27(1):37-60.
65. Bureau M, and Banerjee R. Structure-volume relationships in hemoglobin. A densitometric and dilatometric study of the oxy leads to deoxy transformation. *Biochimie.* 1976;58(403-7).
66. Dyrda A, Cytlak U, Ciuraszkiewicz A, Lipinska A, Cuffe A, Bouyer G, Egee S, Bennekou P, Lew VL, and Thomas SL. Local membrane deformations activate Ca<sup>2+</sup>-dependent K<sup>+</sup> and anionic currents in intact human red blood cells. *PLoS One.* 2010;5(2):e9447.
